# Supplementary material for: Pd/Ni catalyzed selective N–H/C–H methylation of amides by using peroxides as the methylating reagents via a radical process
Source: Royal Society of Chemistry journal article supplement (doi:10.1039/c7qo00625j), 2017-01-01

# **Pd/Ni Catalyzed selective N–H/C–H Methylation of Amides by Using Peroxides as the Methylating Reagents via a Radical Process**

Ze-lin Li <sup>a</sup>, and Chun Cai\*<sup>a</sup>

<sup>a</sup> Chemical Engineering College, Nanjing University of Science and Technology, Nanjing 210094,  
People's Republic of China

Fax: (+86)-25-8431-5030; phone: (+86)-25-8431-5514; e-mail: c.cai@mail.njust.edu.cn

|                                 |           |
|---------------------------------|-----------|
| <b>1. General information</b>   | <b>2</b>  |
| <b>2. General procedure</b>     | <b>2</b>  |
| <b>3. Characterization data</b> | <b>3</b>  |
| <b>4. NMR spectra</b>           | <b>10</b> |

## 1. General information

All compounds are characterized by  $^1\text{H}$  NMR,  $^{13}\text{C}$  NMR and MS. Analytical thin-layer chromatography is performed on glass plates precoated with silica gel impregnated with a fluorescent indicator (254 nm), and the plates are visualized by exposure to ultraviolet light.  $^1\text{H}$  NMR and  $^{13}\text{C}$  NMR spectra are recorded on an AVANCE 500 Bruker spectrometer operating at 500 MHz and 125 MHz in  $\text{CDCl}_3$ , respectively, and chemical shifts are reported in ppm. GC analyses are performed on an Agilent 7890A instrument (Column: Agilent 19091J-413:30 m  $\times$  320  $\mu\text{m}$   $\times$  0.25  $\mu\text{m}$ , H, FID detection). GC-MS data was recorded on a 5975C Mass Selective Detector, coupled with a 7890A Gas Chromatograph (Agilent Technologies).

## 2. General procedure

**General procedure for the synthesis of N-methyl amides :** To a mixture of benzene sulfonamide (0.5 mmol) **1a**,  $\text{Ni}(\text{OTf})_2$  (10%mmol) and solvent ( $\text{HOAc}/\text{H}_2\text{O}=1\text{ml} : 1\text{ml}$ ) in a reaction tube was added peroxide (3 equiv.). The reaction mixture was stirred at  $120^\circ\text{C}$  overnight in air. The reaction mixture was extracted with ethyl acetate (15 mL  $\times$  3). The combined organic layers were washed with brine, dried over  $\text{MgSO}_4$ , and concentrated in vacuo. The residue was purified by column chromatography on silica gel to afford the desired products **3**.

**General procedure for the synthesis of C-methyl amides :** To a mixture of benzene sulfonamide (0.5 mmol) **1a**,  $\text{Pd}(\text{OAc})_2$  (10%mmol) and solvent (2ml) in a reaction tube was added peroxide (3 equiv.). The reaction mixture was stirred at  $120^\circ\text{C}$  overnight in air. The reaction mixture was extracted with ethyl acetate (15 mL  $\times$  3). The combined organic layers were washed with brine, dried over  $\text{MgSO}_4$ , and concentrated in vacuo. The residue was purified by column chromatography on silica gel to afford the desired products **4**.

### 3.Characterization data

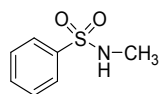

Formula: C<sub>7</sub>H<sub>9</sub>NO<sub>2</sub>S  
Mass: 171

**N-methylbenzenesulfonamide (3a):** The crude product was purified by column chromatography on silica gel (petroleum ether/ethyl acetate = 3:1) to give **3a** as white solid (61.6mg, 72%). <sup>1</sup>H NMR (500 MHz, Chloroform-*d*) δ 7.83 (dd, *J* = 7.6, 1.8 Hz, 2H), 7.58 – 7.41 (m, 3H), 5.26 (q, *J* = 5.5 Hz, 1H), 2.57 (d, *J* = 5.2 Hz, 3H). <sup>13</sup>C NMR (126 MHz, Chloroform-*d*) δ 137.6, 131.8, 128.2, 126.2, 28.3. GC-MS (EI) *m/z*: 171.

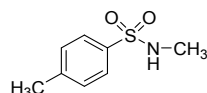

Formula: C<sub>8</sub>H<sub>11</sub>NO<sub>2</sub>S  
Mass: 185

**N,4-dimethylbenzenesulfonamide (3b):** The crude product was purified by column chromatography on silica gel (petroleum ether/ethyl acetate = 3:1) to give **3b** as white solid (66.6mg, 72%). <sup>1</sup>H NMR (500 MHz, Chloroform-*d*) δ 7.74 (dd, *J* = 8.3, 2.0 Hz, 2H), 7.31 (dd, *J* = 8.2, 2.0 Hz, 2H), 4.55 (q, *J* = 5.6 Hz, 1H), 2.64 (s, 3H), 2.42 (s, 3H). <sup>13</sup>C NMR (126 MHz, Chloroform-*d*) δ 142.5, 134.8, 128.8, 126.3, 28.4, 20.6. GC-MS (EI) *m/z*: 185.

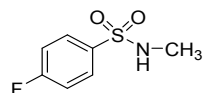

Formula: C<sub>7</sub>H<sub>8</sub>FNO<sub>2</sub>S  
Mass: 189

**4-fluoro-N-methylbenzenesulfonamide (3c):** The crude product was purified by column chromatography on silica gel (petroleum ether/ethyl acetate = 3:1) to give **3c** as white solid (69.9mg, 74%). <sup>1</sup>H NMR (500 MHz, Chloroform-*d*) δ 7.95 – 7.82 (m, 2H), 7.24 – 7.12 (m, 2H), 4.92 (q, *J* = 5.4 Hz, 1H), 2.63 (d, *J* = 5.3 Hz, 3H). <sup>13</sup>C NMR (126 MHz, Chloroform-*d*) δ 165.2, 163.1, 133.9, 129.0, 115.5, 28.3. GC-MS (EI) *m/z*: 189.

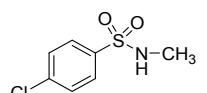

Formula: C<sub>7</sub>H<sub>8</sub>ClNO<sub>2</sub>S  
Mass: 205

**4-chloro-N-methylbenzenesulfonamide (3d):** The crude product was purified by column chromatography on silica gel (petroleum ether/ethyl acetate = 3:1) to give **3d** as white solid (69.7mg, 68%). <sup>1</sup>H NMR (500 MHz, Chloroform-*d*) δ 7.80 (d, *J* = 8.6 Hz, 2H), 7.50 (d, *J* = 8.5 Hz, 2H), 4.57 (q, *J* = 5.5 Hz, 1H), 2.67 (d, *J* = 5.4 Hz, 3H). <sup>13</sup>C NMR (126 MHz, Chloroform-*d*) δ 138.3, 136.5, 128.5, 127.7, 28.3. GC-MS (EI) *m/z*: 205.

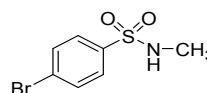

Formula: C<sub>7</sub>H<sub>8</sub>BrNO<sub>2</sub>S  
Mass: 249

**4-bromo-N-methylbenzenesulfonamide (3e):** The crude product was purified by column chromatography on silica gel (petroleum ether/ethyl acetate = 3:1) to give **3e** as white solid (89.6mg, 72%). <sup>1</sup>H NMR (500 MHz, Chloroform-*d*) δ 7.76 – 7.61 (m, 4H), 4.70 (q, *J* = 5.5 Hz, 1H), 2.65 (d, *J* = 5.3 Hz, 3H). <sup>13</sup>C NMR (126 MHz,

Chloroform-*d*)  $\delta$  136.9, 131.5, 127.8, 126.8, 28.3. GC-MS (EI) *m/z*: 249.

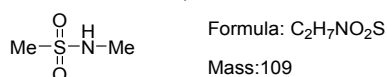

**N-methylmethanesulfonamide (3f):** The crude product was purified by column chromatography on silica gel (petroleum ether/ethyl acetate = 3:1) to give **3f** as white solid (37.6mg, 69%). <sup>1</sup>H NMR (500 MHz, Chloroform-*d*)  $\delta$  5.00 (s, 1H), 2.85 (s, 3H), 2.69 (d, *J* = 5.2 Hz, 3H). <sup>13</sup>C NMR (126 MHz, Chloroform-*d*)  $\delta$  37.2, 28.3. GC-MS (EI) *m/z*: 109.

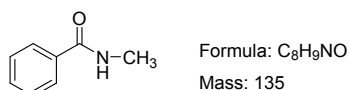

**N-methylbenzamide (3g):** The crude product was purified by column chromatography on silica gel (petroleum ether/ethyl acetate = 3:1) to give **3g** as white solid (40.5mg, 60%). <sup>1</sup>H NMR (500 MHz, Chloroform-*d*)  $\delta$  7.81 – 7.70 (m, 2H), 7.49 (t, *J* = 7.4 Hz, 1H), 7.42 (t, *J* = 7.5 Hz, 2H), 6.20 (s, 1H), 3.01 (d, *J* = 4.9 Hz, 3H). <sup>13</sup>C NMR (126 MHz, Chloroform-*d*)  $\delta$  167.3, 133.7, 130.4, 127.6, 125.8, 25.9. GC-MS (EI) *m/z*: 135.

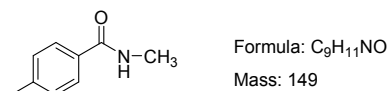

**N,4-dimethylbenzamide (3h):** The crude product was purified by column chromatography on silica gel (petroleum ether/ethyl acetate = 3:1) to give **3h** as white solid (49.9mg, 67%). <sup>1</sup>H NMR (500 MHz, Chloroform-*d*)  $\delta$  7.65 (d, *J* = 8.1 Hz, 2H), 7.20 (d, *J* = 7.9 Hz, 2H), 6.28 (s, 1H), 2.98 (d, *J* = 4.8 Hz, 3H), 2.37 (s, 3H). <sup>13</sup>C NMR (126 MHz, Chloroform-*d*)  $\delta$  167.3, 140.7, 130.8, 128.2, 125.9, 25.8, 20.5. GC-MS (EI) *m/z*: 149.

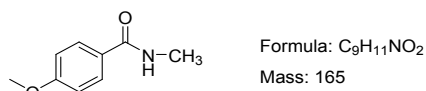

**4-methoxy-N-methylbenzamide (3i):** The crude product was purified by column chromatography on silica gel (petroleum ether/ethyl acetate = 3:1) to give **3i** as white solid (51.2mg, 62%). <sup>1</sup>H NMR (500 MHz, Chloroform-*d*)  $\delta$  7.72 (d, *J* = 8.8 Hz, 2H), 6.89 (d, *J* = 8.8 Hz, 2H), 6.24 (s, 1H), 3.83 (s, 3H), 2.97 (d, *J* = 4.8 Hz, 3H). <sup>13</sup>C NMR (126 MHz, Chloroform-*d*)  $\delta$  166.8, 161.1, 127.6, 126.0, 112.7, 54.4, 25.8. GC-MS (EI) *m/z*: 165.

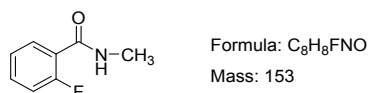

**2-fluoro-N-methylbenzamide (3j):** The crude product was purified by column chromatography on silica gel (petroleum ether/ethyl acetate = 3:1) to give **3j** as white solid (40.5mg, 53%). <sup>1</sup>H NMR (500 MHz, Chloroform-*d*)  $\delta$  8.14 – 8.07 (m, 1H), 7.48 – 7.42 (m, 1H), 7.28 – 7.24 (m, 1H), 7.10 (dd, *J* = 12.1, 8.3 Hz, 1H), 6.76 (s, 1H), 3.04 (s, 3H). <sup>13</sup>C NMR (126 MHz, Chloroform-*d*)  $\delta$  163.1, 132.2, 131.1, 123.8, 120.0, 115.1, 114.9, 25.9. GC-MS (EI) *m/z*: 153.

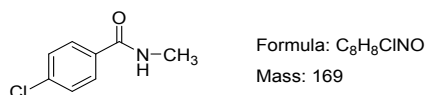

**4-chloro-N-methylbenzamide (3k):** The crude product was purified by column chromatography on silica gel (petroleum ether/ethyl acetate = 3:1) to give **3k** as white solid (58.3mg, 69%). <sup>1</sup>H NMR (500 MHz, Chloroform-*d*) δ 7.69 (d, *J* = 8.6 Hz, 2H), 7.38 (d, *J* = 8.4 Hz, 2H), 6.33 (s, 1H), 2.99 (d, *J* = 4.8 Hz, 3H). <sup>13</sup>C NMR (126 MHz, Chloroform-*d*) δ 166.3, 136.6, 132.0, 127.8, 127.3, 25.9. GC-MS (EI) *m/z*: 169.

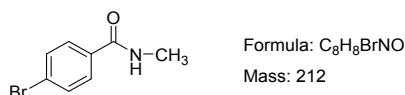

**4-bromo-N-methylbenzamide (3l):** The crude product was purified by column chromatography on silica gel (petroleum ether/ethyl acetate = 3:1) to give **3l** as white solid (63.6mg, 60%). <sup>1</sup>H NMR (500 MHz, Chloroform-*d*) δ 7.62 (d, *J* = 8.5 Hz, 2H), 7.53 (d, *J* = 8.5 Hz, 2H), 6.38 (s, 1H), 2.98 (d, *J* = 4.8 Hz, 3H). <sup>13</sup>C NMR (126 MHz, Chloroform-*d*) δ 166.4, 130.8, 127.5, 125.0, 25.9. GC-MS (EI) *m/z*: 212.

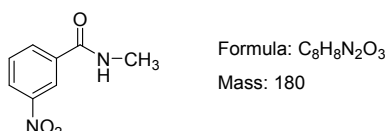

**N-methyl-3-nitrobenzamide (3m):** The crude product was purified by column chromatography on silica gel (petroleum ether/ethyl acetate = 3:1) to give **3m** as white solid (49.5mg, 55%). <sup>1</sup>H NMR (500 MHz, Chloroform-*d*) δ 8.58 (t, *J* = 2.0 Hz, 1H), 8.39 – 8.31 (m, 1H), 8.16 (d, *J* = 7.7 Hz, 1H), 7.65 (t, *J* = 8.0 Hz, 1H), 6.41 (s, 1H), 3.07 (d, *J* = 4.8 Hz, 3H). <sup>13</sup>C NMR (126 MHz, Chloroform-*d*) δ 164.9, 147.2, 135.2, 132.2, 128.9, 125.0, 120.7, 26.1. GC-MS (EI) *m/z*: 180.

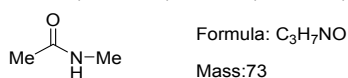

**N-methylacetamide (3n):** The crude product was purified by column chromatography on silica gel (petroleum ether/ethyl acetate = 3:1) to give **3n** as white solid (23.7mg, 65%). <sup>1</sup>H NMR (500 MHz, Chloroform-*d*) δ 7.20 (s, 1H), 2.53 (d, *J* = 4.8 Hz, 3H), 1.76 (s, 3H). <sup>13</sup>C NMR (126 MHz, Chloroform-*d*) δ 170.5, 25.0, 21.6. GC-MS (EI) *m/z*: 73.

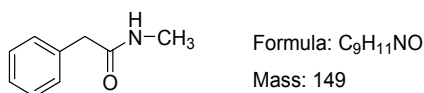

**N-methyl-2-phenylacetamide (3o):** The crude product was purified by column chromatography on silica gel (petroleum ether/ethyl acetate = 3:1) to give **3o** as white solid (52.2mg, 70%). <sup>1</sup>H NMR (500 MHz, Chloroform-*d*) δ 7.39 – 7.23 (m, 5H), 5.38 (s, 1H), 3.58 (s, 2H), 2.75 (d, *J* = 4.9 Hz, 3H). <sup>13</sup>C NMR (126 MHz, Chloroform-*d*) δ 170.6, 133.9, 128.6, 128.1, 126.4, 42.8, 25.5. GC-MS (EI) *m/z*: 149.

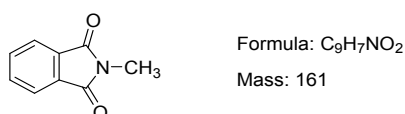

**2-methylisoindoline-1,3-dione (3p):** The crude product was purified by column

chromatography on silica gel (petroleum ether/ethyl acetate = 3:1) to give **3p** as white solid (55.5mg, 69%). <sup>1</sup>H NMR (500 MHz, Chloroform-*d*) δ 7.85 – 7.73 (m, 2H), 7.72 – 7.60 (m, 2H), 3.13 (s, 3H). <sup>13</sup>C NMR (126 MHz, Chloroform-*d*) δ 167.4, 132.9, 131.2, 122.1, 22.9. GC-MS (EI) *m/z*: 161.

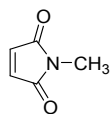

Formula: C<sub>5</sub>H<sub>5</sub>NO<sub>2</sub>

Mass: 111

**1-methyl-1H-pyrrole-2,5-dione (3q):** The crude product was purified by column chromatography on silica gel (petroleum ether/ethyl acetate = 3:1) to give **3q** as white solid (34.4mg, 62%). <sup>1</sup>H NMR (500 MHz, Chloroform-*d*) δ 6.69 (s, 2H), 2.99 (s, 3H). <sup>13</sup>C NMR (126 MHz, Chloroform-*d*) δ 169.8, 133.2, 22.7. GC-MS (EI) *m/z*: 111.

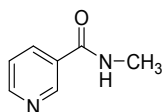

Formula: C<sub>7</sub>H<sub>8</sub>N<sub>2</sub>O

Mass: 136

**N-methylnicotinamide (3r):** The crude product was purified by column chromatography on silica gel (petroleum ether/ethyl acetate = 3:1) to give **3r** as white solid (46.9mg, 69%). <sup>1</sup>H NMR (500 MHz, Chloroform-*d*) δ 8.95 (d, *J* = 1.9 Hz, 1H), 8.66 – 8.56 (m, 1H), 8.08 (d, *J* = 7.9 Hz, 1H), 7.33 – 7.28 (m, 1H), 7.19 (s, 1H), 2.96 (d, *J* = 4.7 Hz, 3H). <sup>13</sup>C NMR (126 MHz, Chloroform-*d*) δ 165.5, 150.9, 147.0, 134.2, 129.4, 122.5, 25.9. GC-MS (EI) *m/z*: 136.

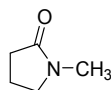

Formula: C<sub>5</sub>H<sub>9</sub>NO

Mass: 99

**1-methylpyrrolidin-2-one (3s):** The crude product was purified by column chromatography on silica gel (petroleum ether/ethyl acetate = 3:1) to give **3s** as white solid (37.6mg, 76%). <sup>1</sup>H NMR (500 MHz, Chloroform-*d*) δ 3.11 (t, *J* = 5.0 Hz, 2H), 2.54 (s, 3H), 2.06 (t, *J* = 7.5 Hz, 2H), 1.79 – 1.68 (m, 2H). <sup>13</sup>C NMR (126 MHz, Chloroform-*d*) δ 173.9, 48.2, 29.5, 28.3, 16.4. GC-MS (EI) *m/z*: 99.

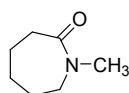

Formula: C<sub>7</sub>H<sub>13</sub>NO

Mass: 127

**1-methylazepan-2-one (3t):** The crude product was purified by column chromatography on silica gel (petroleum ether/ethyl acetate = 3:1) to give **3t** as white solid (47.6mg, 75%). <sup>1</sup>H NMR (500 MHz, Chloroform-*d*) δ 3.14 – 3.00 (m, 2H), 2.75 – 2.58 (m, 3H), 2.21 (dp, *J* = 15.7, 6.0, 5.5 Hz, 2H), 1.53 – 1.21 (m, 6H). <sup>13</sup>C NMR (126 MHz, Chloroform-*d*) δ 174.6, 50.1, 35.7, 34.5, 28.6, 26.4, 22.2. GC-MS (EI) *m/z*: 127.

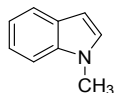

Formula: C<sub>9</sub>H<sub>9</sub>N

Mass: 131

**1-methyl-1H-indole (3v):** The crude product was purified by column chromatography on silica gel (petroleum ether/ethyl acetate = 3:1) to give **3v** as white solid (43.2mg, 66%). <sup>1</sup>H NMR (500 MHz, Chloroform-*d*) δ 8.15 – 7.97 (m, 1H), 7.70 – 7.48 (m, 3H), 7.28 (dt, *J* = 9.3, 3.1 Hz, 1H), 6.95 – 6.79 (m, 1H), 3.92 (s, 3H). <sup>13</sup>C NMR (126 MHz, Chloroform-*d*) δ 136.2, 128.3, 128.0, 120.9, 120.3, 118.7, 108.7, 100.3, 31.9. GC-MS

(EI)  $m/z$ : 131.

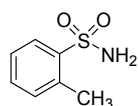

Formula:  $C_7H_9NO_2S$

Mass: 171

**2-methylbenzenesulfonamide (4a):** The crude product was purified by column chromatography on silica gel (petroleum ether/ethyl acetate = 3:1) to give **4a** as white solid (55.8mg, 65%).  $^1H$  NMR (500 MHz, DMSO- $d_6$ )  $\delta$  7.82 (d,  $J = 7.7$  Hz, 1H), 7.43 (t,  $J = 7.4$  Hz, 1H), 7.36 – 7.29 (m, 4H), 2.56 (s, 3H).  $^{13}C$  NMR (126 MHz, DMSO- $d_6$ )  $\delta$  141.6, 135.3, 131.6, 131.3, 126.4, 125.5, 19.3. GC-MS (EI)  $m/z$ : 171.

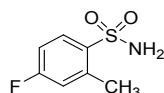

Formula:  $C_7H_8FNO_2S$

Mass: 189

**4-fluoro-2-methylbenzenesulfonamide (4b):** The crude product was purified by column chromatography on silica gel (petroleum ether/ethyl acetate = 3:1) to give **4b** as white solid (54.8mg, 58%).  $^1H$  NMR (500 MHz, DMSO- $d_6$ )  $\delta$  7.84 (dd,  $J = 8.8, 5.9$  Hz, 1H), 7.39 (s, 2H), 7.22 (dd,  $J = 10.0, 2.7$  Hz, 1H), 7.18 – 7.12 (m, 1H), 2.55 (s, 3H).  $^{13}C$  NMR (126 MHz, DMSO- $d_6$ )  $\delta$  163.8, 161.8, 139.1, 138.1, 129.4, 118.1, 112.1, 19.3. GC-MS (EI)  $m/z$ : 189.

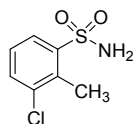

Formula:  $C_7H_8ClNO_2S$

Mass: 205

**3-chloro-2-methylbenzenesulfonamide (4c):** The crude product was purified by column chromatography on silica gel (petroleum ether/ethyl acetate = 3:1) to give **4c** as white solid (44.1mg, 43%).  $^1H$  NMR (500 MHz, DMSO- $d_6$ )  $\delta$  7.81 (d,  $J = 7.8$  Hz, 1H), 7.64 (d,  $J = 7.9$  Hz, 1H), 7.55 (s, 2H), 7.35 (t,  $J = 8.0$  Hz, 1H), 2.58 (s, 3H).  $^{13}C$  NMR (126 MHz, DMSO- $d_6$ )  $\delta$  143.8, 135.0, 133.0, 132.0, 126.7, 125.5, 16.1. GC-MS (EI)  $m/z$ : 205.

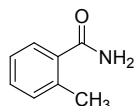

Formula:  $C_8H_9NO$

Mass: 135

**2-methylbenzamide (4d):** The crude product was purified by column chromatography on silica gel (petroleum ether/ethyl acetate = 3:1) to give **4d** as white solid (34.4mg, 51%).  $^1H$  NMR (500 MHz, Chloroform- $d$ )  $\delta$  7.43 (dd,  $J = 7.5, 1.3$  Hz, 1H), 7.32 (td,  $J = 7.5, 1.4$  Hz, 1H), 7.24 – 7.16 (m, 2H), 6.33 (s, 1H), 5.89 (s, 1H), 2.48 (s, 3H).  $^{13}C$  NMR (126 MHz, Chloroform- $d$ )  $\delta$  171.4, 135.3, 134.3, 130.2, 129.3, 126.0, 124.8, 19.0. GC-MS (EI)  $m/z$ : 135.

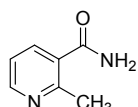

Formula:  $C_7H_8N_2O$

Mass: 136

**2-methylnicotinamide (4e):** The crude product was purified by column chromatography on silica gel (petroleum ether/ethyl acetate = 3:1) to give **4e** as white solid (35.4mg, 52%).  $^1H$  NMR (500 MHz, Chloroform- $d$ )  $\delta$  8.57 (dd,  $J = 4.9, 1.6$  Hz, 1H), 7.75 (dd,  $J = 7.7, 1.8$  Hz, 1H), 7.18 (dd,  $J = 7.7, 4.9$  Hz, 1H), 5.93 (d,  $J = 61.4$  Hz, 2H), 2.72 (s, 3H).  $^{13}C$  NMR (126 MHz, Chloroform- $d$ )  $\delta$  169.4, 155.4, 149.6, 133.9,

129.6, 119.8, 22.2. GC-MS (EI)  $m/z$ : 136.

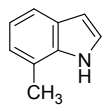

Formula: C<sub>9</sub>H<sub>9</sub>N

Mass: 131

**7-methyl-1H-indole (4f):** The crude product was purified by column chromatography on silica gel (petroleum ether/ethyl acetate = 3:1) to give **4f** as white solid (36.0mg, 55%). <sup>1</sup>H NMR (500 MHz, Chloroform-*d*)  $\delta$  8.05 (s, 1H), 7.54 (d,  $J$  = 7.8 Hz, 1H), 7.21 (t,  $J$  = 2.7 Hz, 1H), 7.11 – 7.00 (m, 2H), 6.63 – 6.56 (m, 1H), 2.52 (s, 3H). <sup>13</sup>C NMR (126 MHz, Chloroform-*d*)  $\delta$  134.5, 126.4, 122.9, 121.5, 119.2, 119.1, 117.5, 102.2, 15.7. GC-MS (EI)  $m/z$ : 131.



## 4. NMR spectra

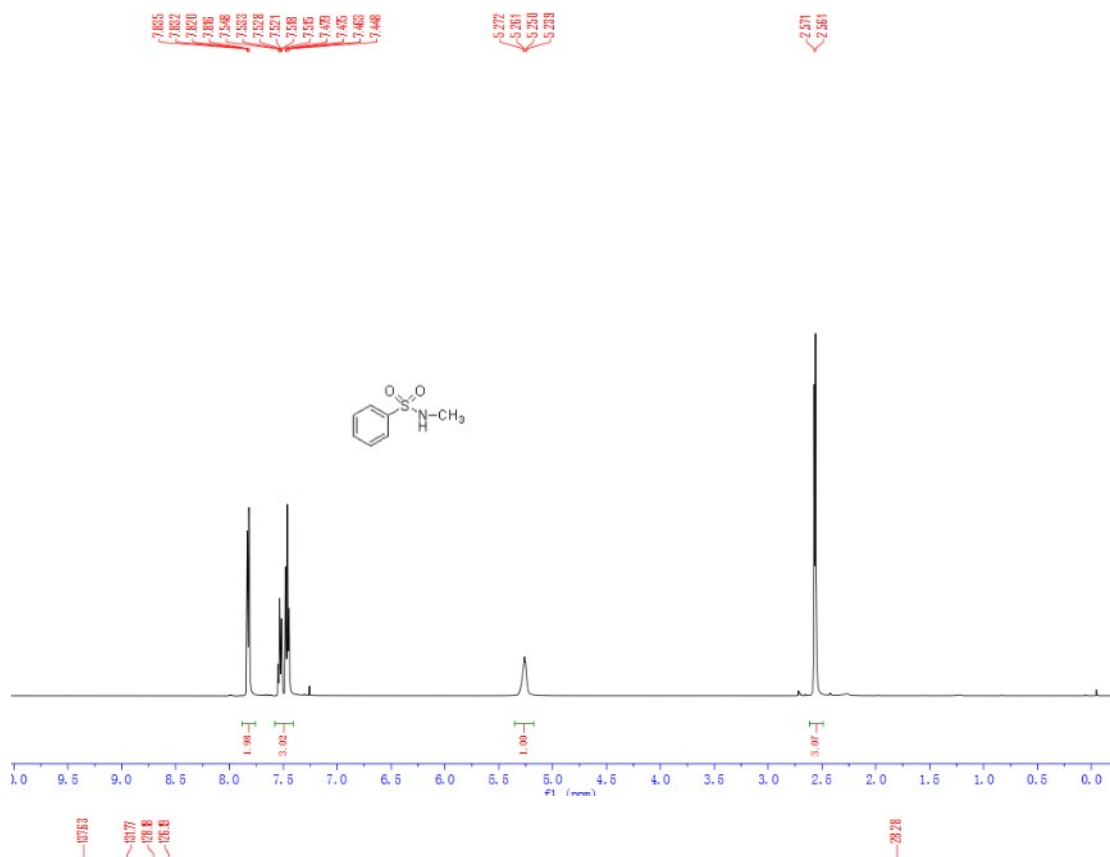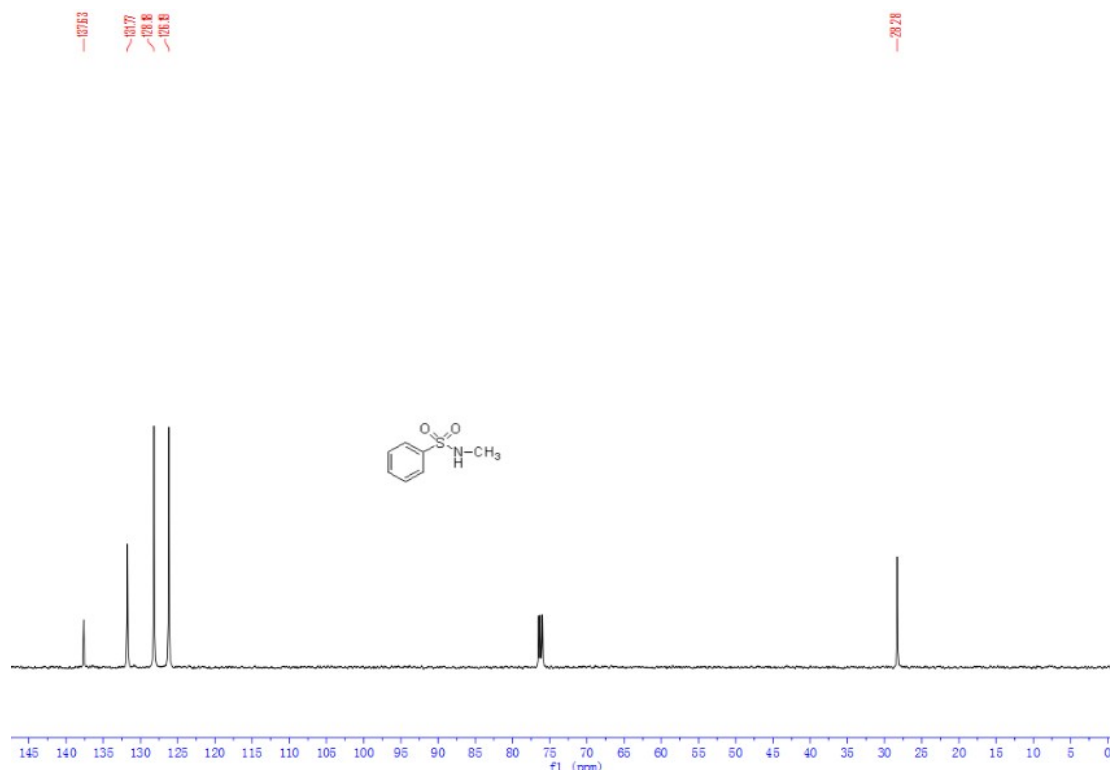

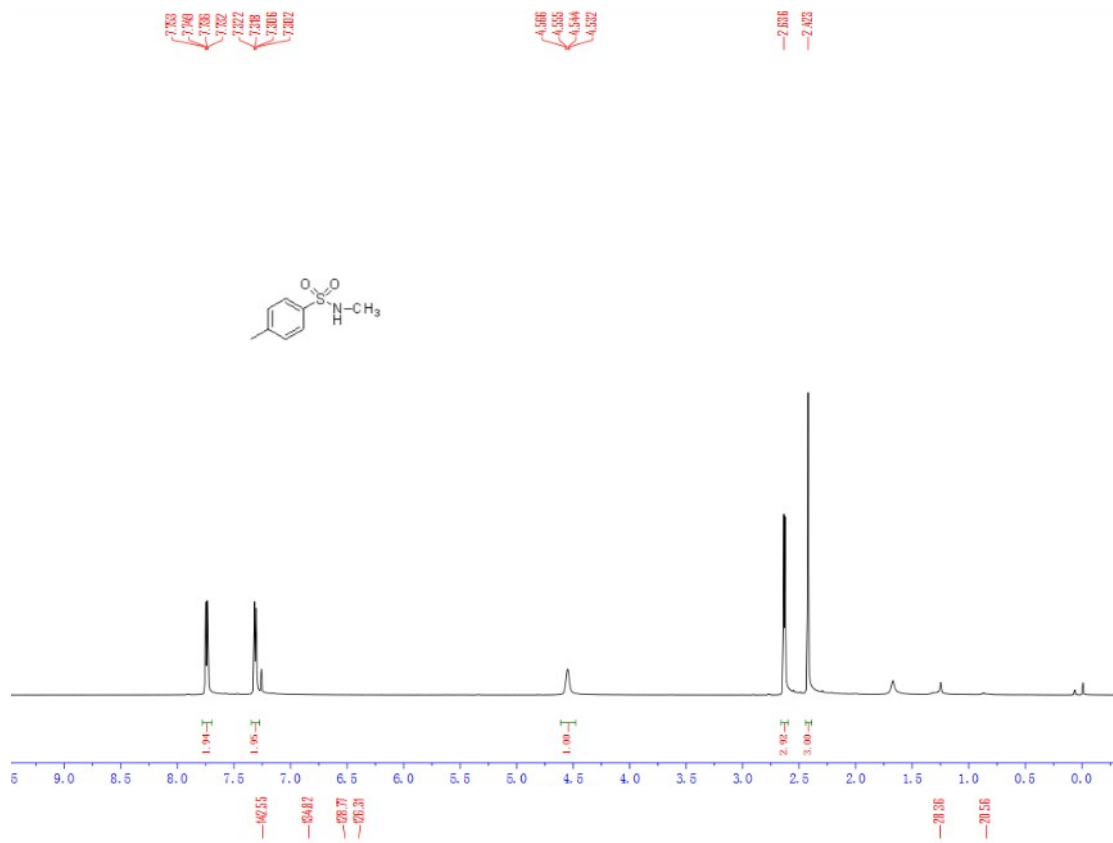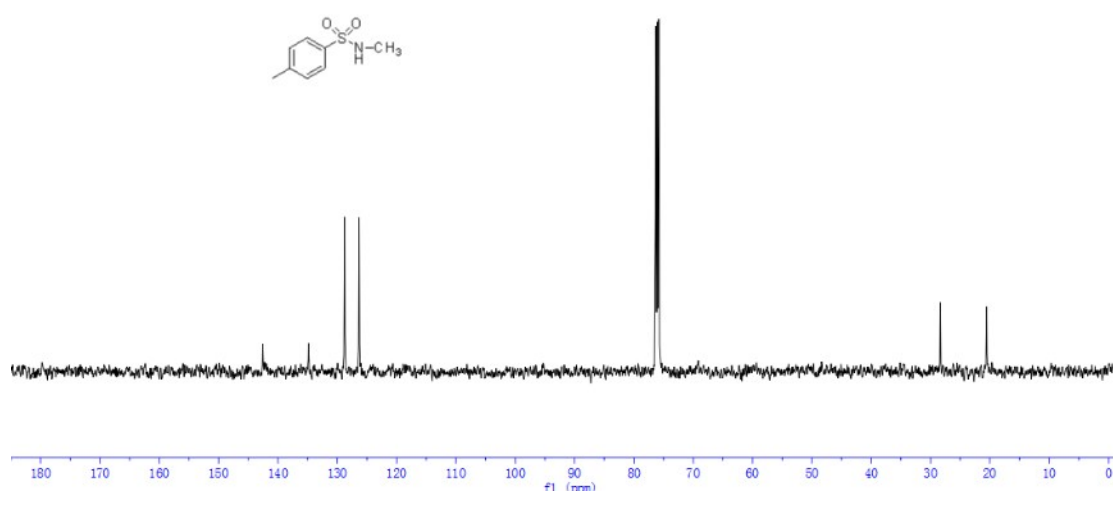

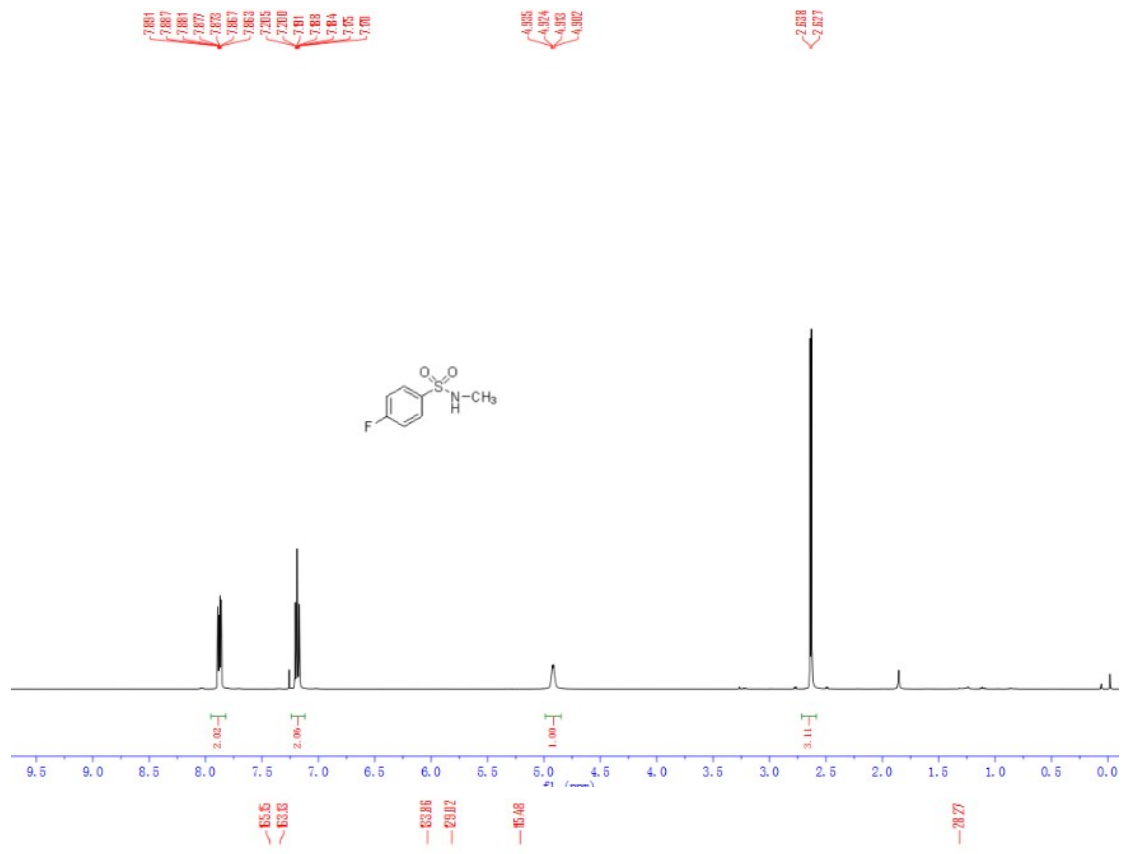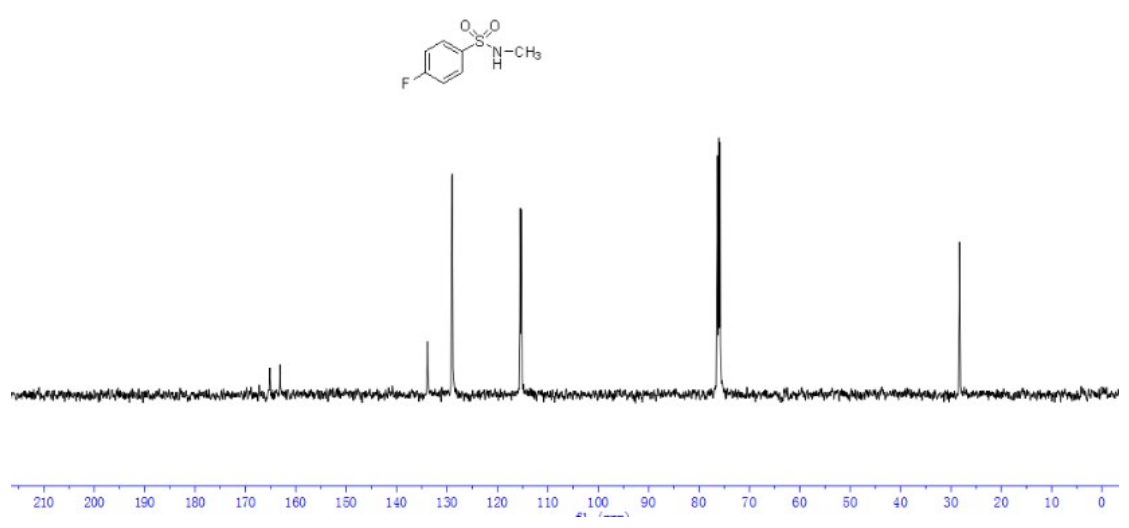

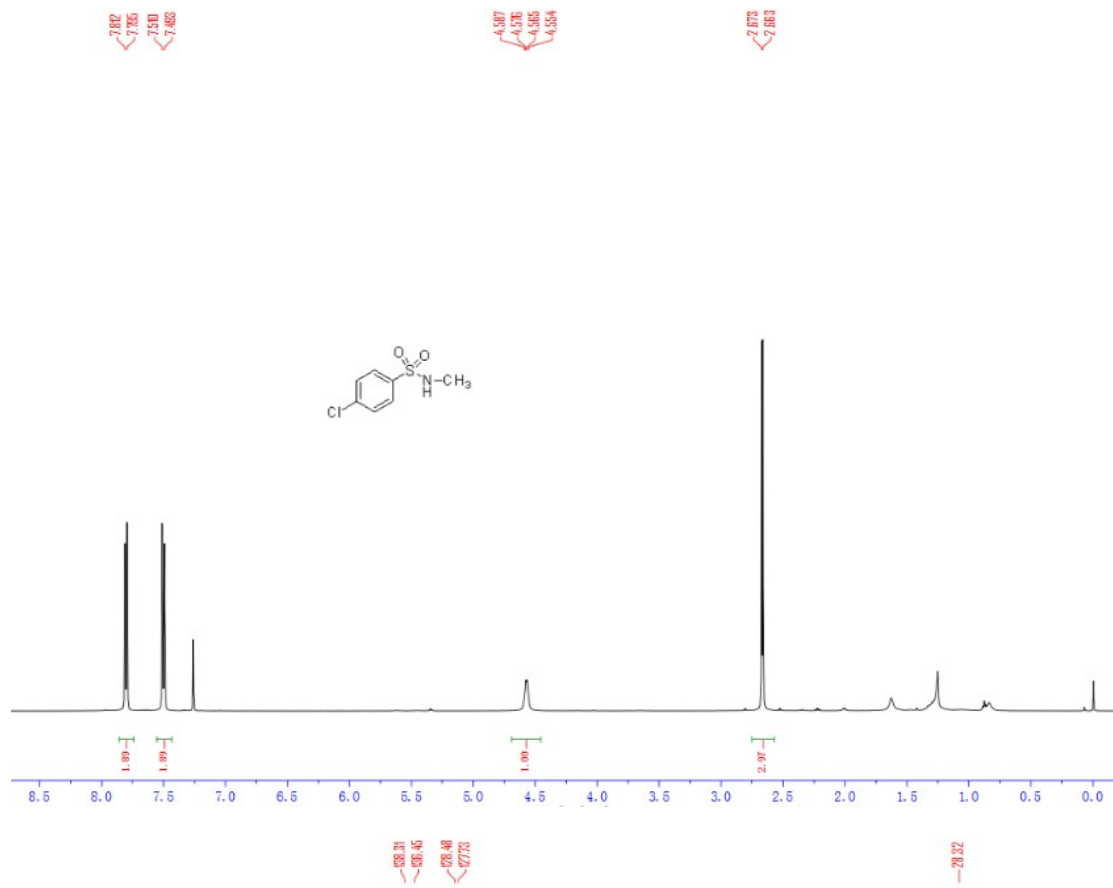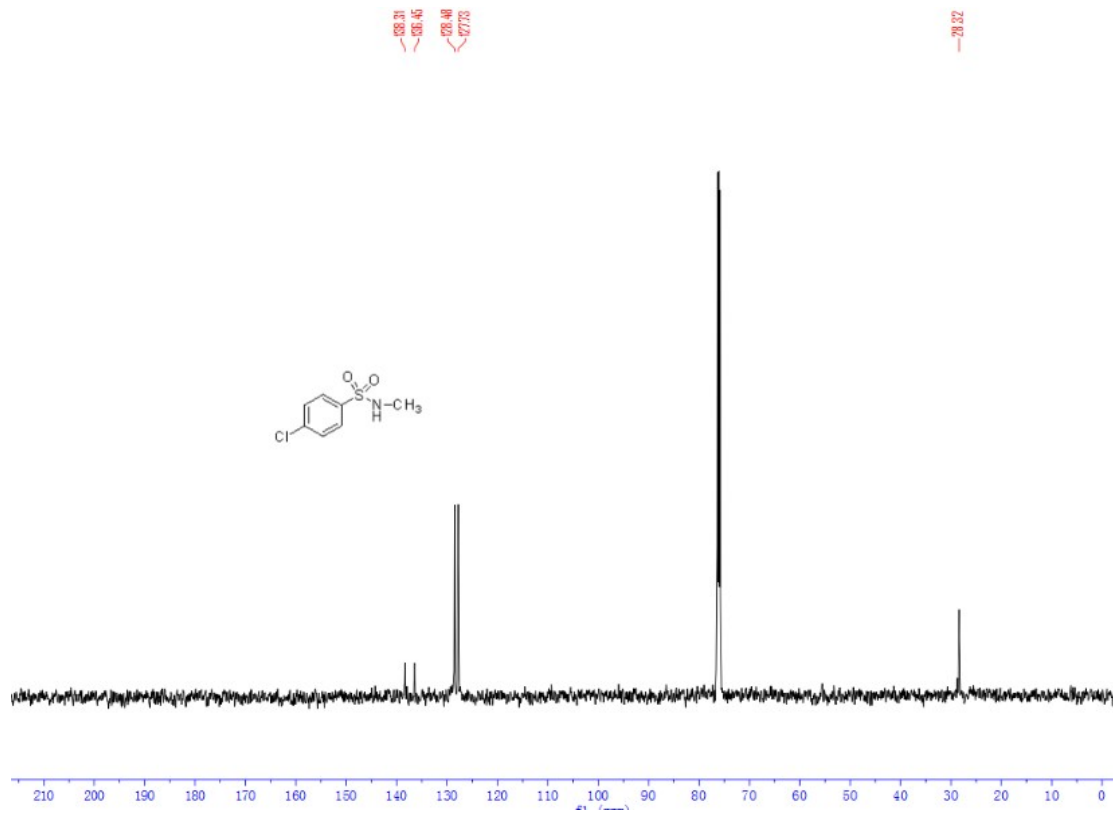

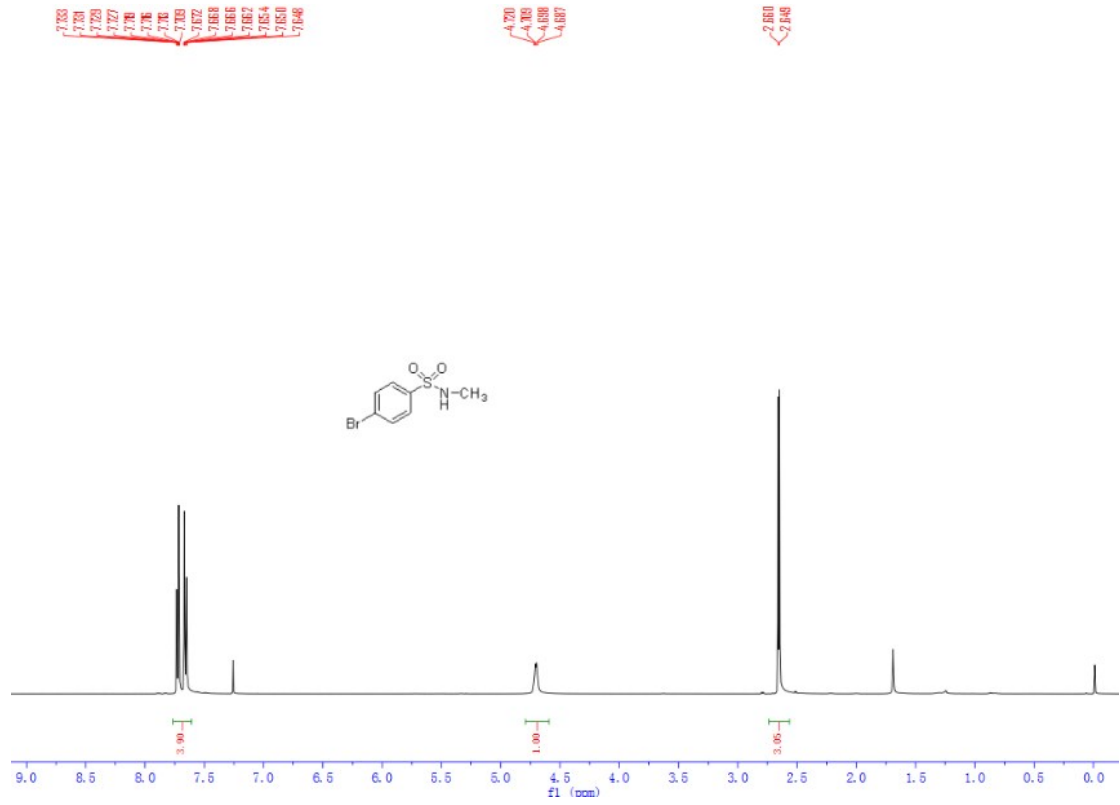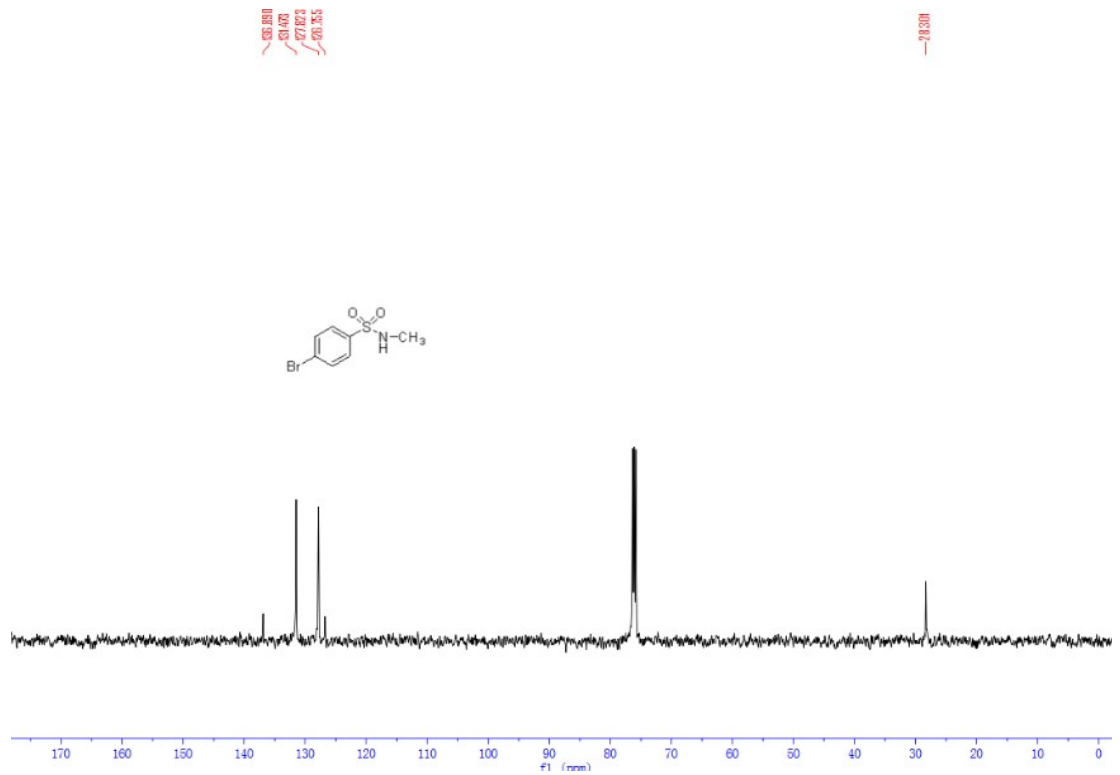

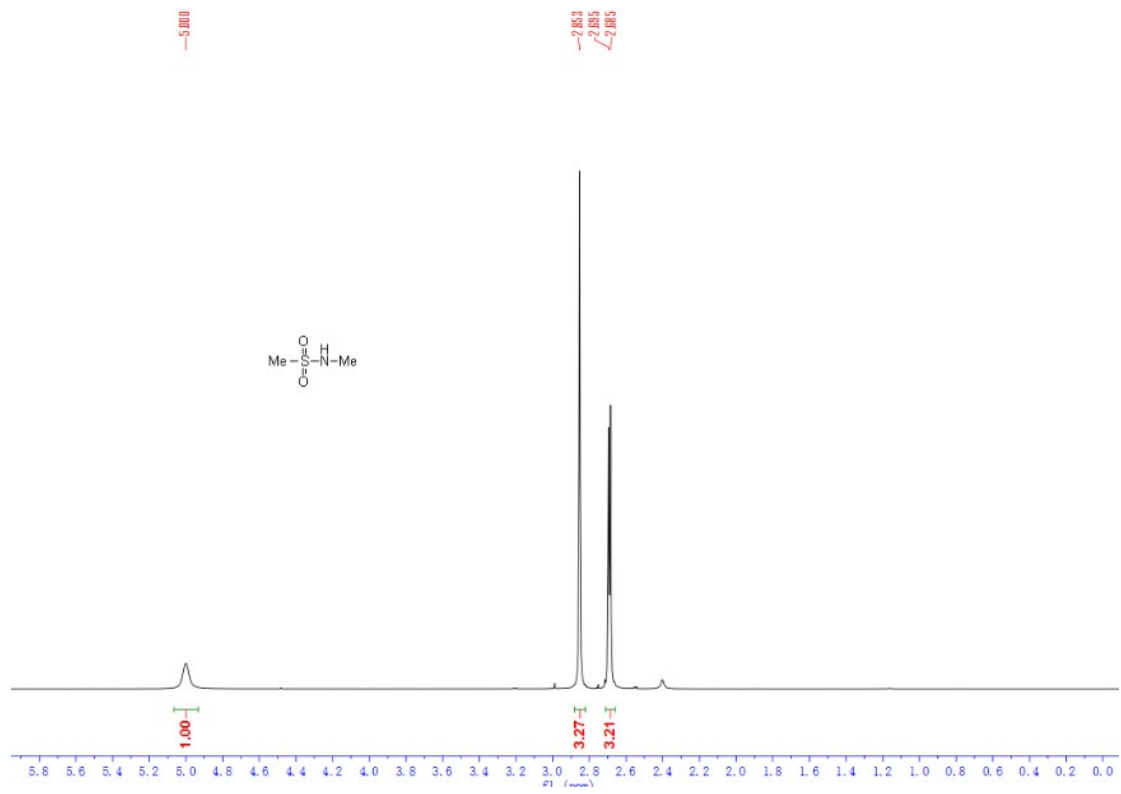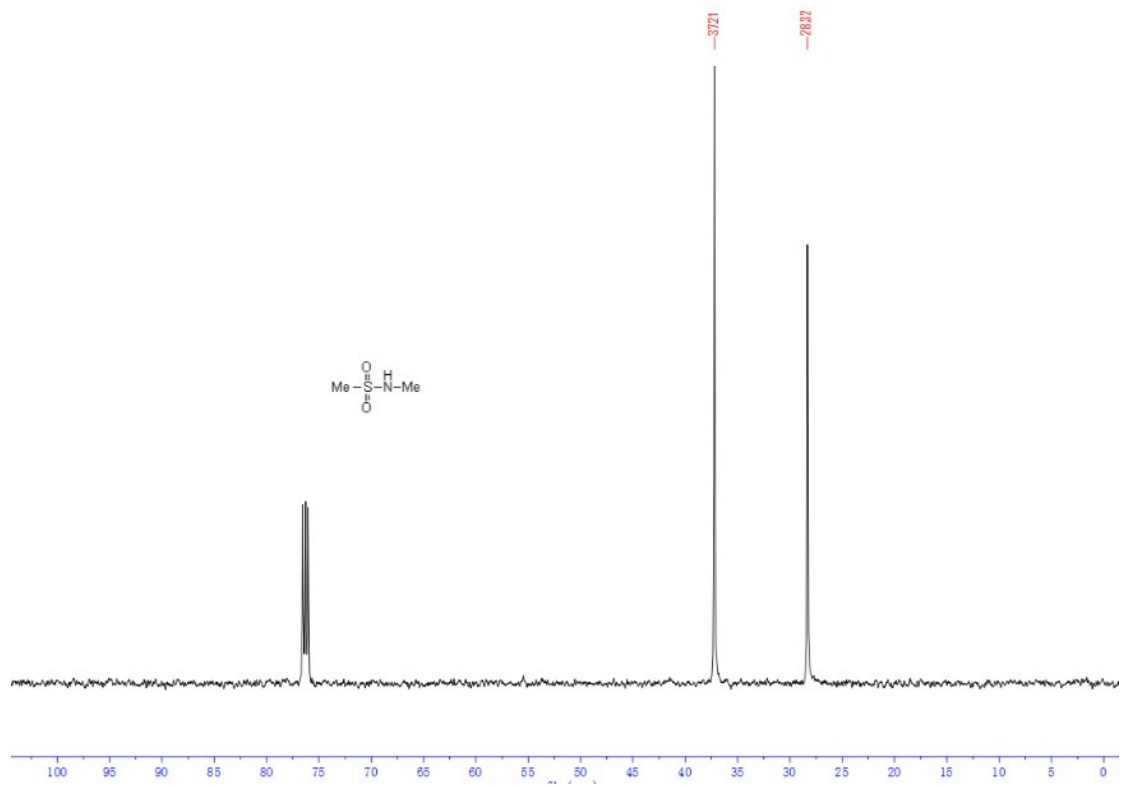

7.785  
7.782  
7.780  
7.778  
7.774  
7.772  
7.764  
7.744

-6.205

3.008  
3.008

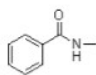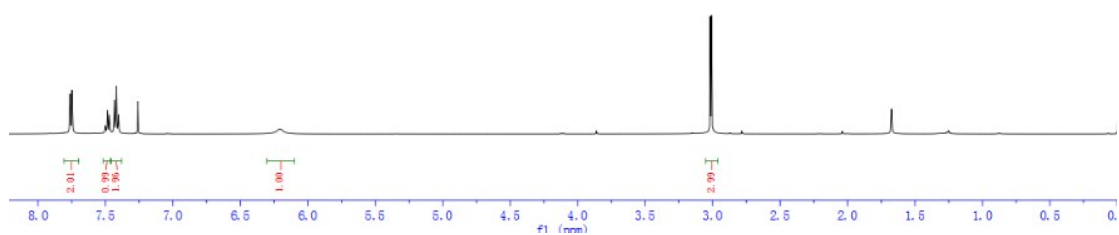

-6.206

-6.209  
-6.207  
-6.205  
-6.204

-2.508

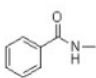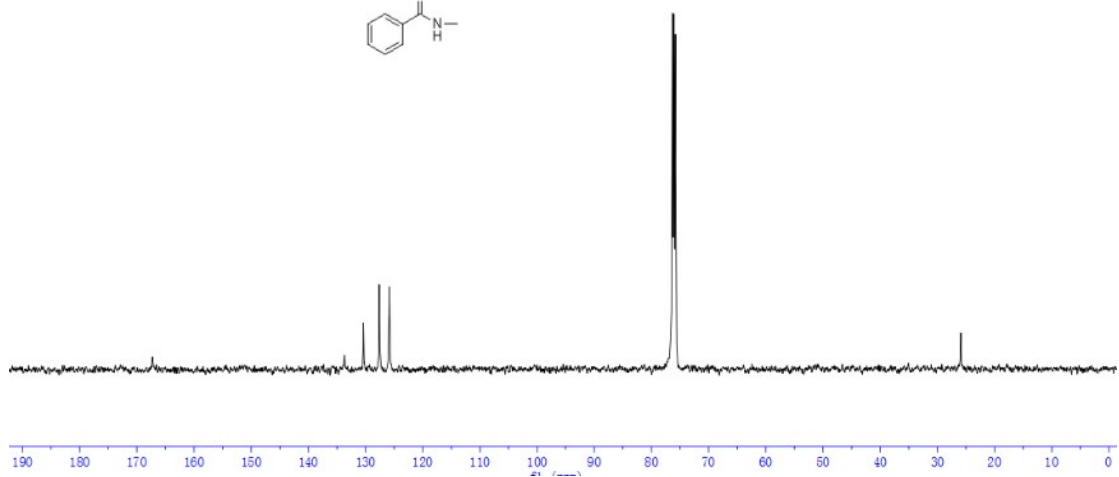

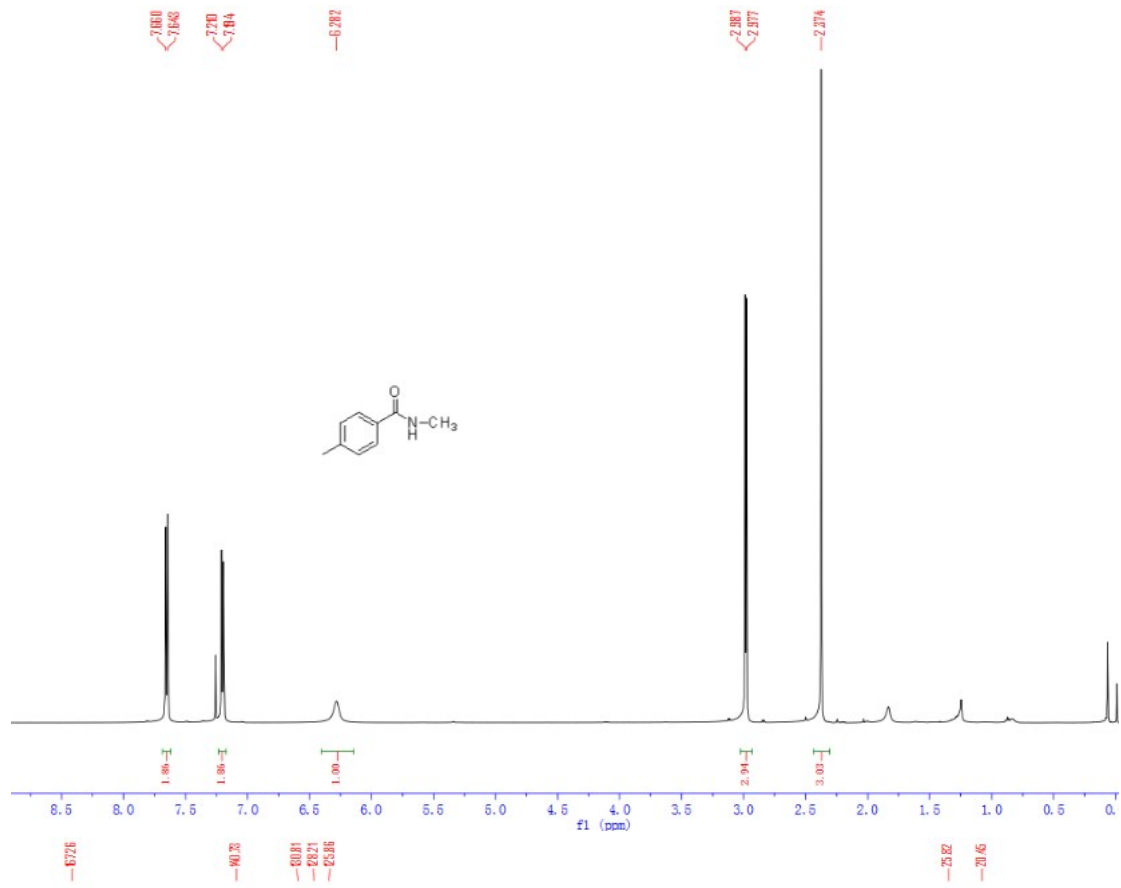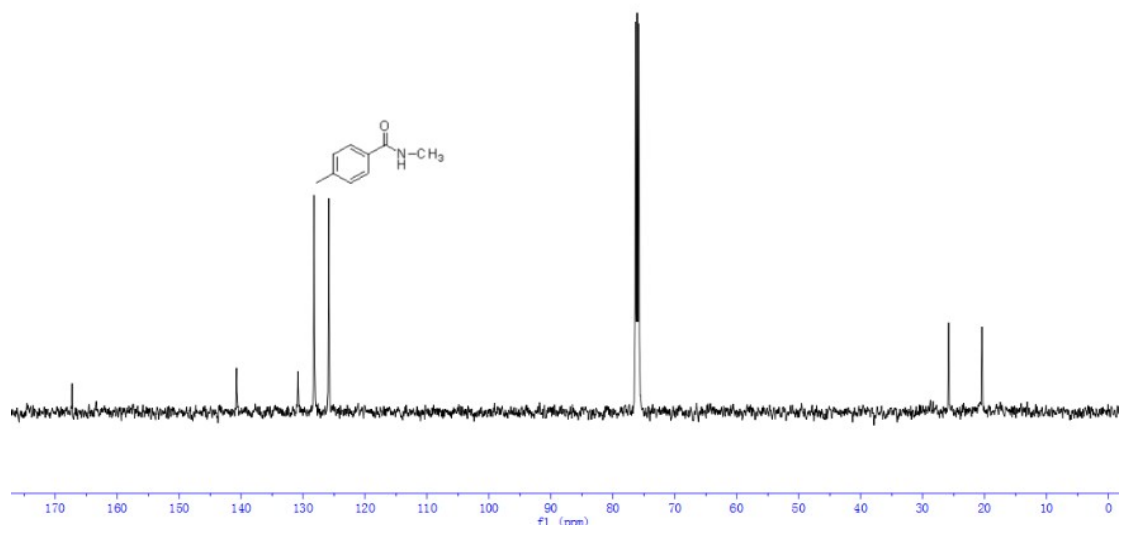



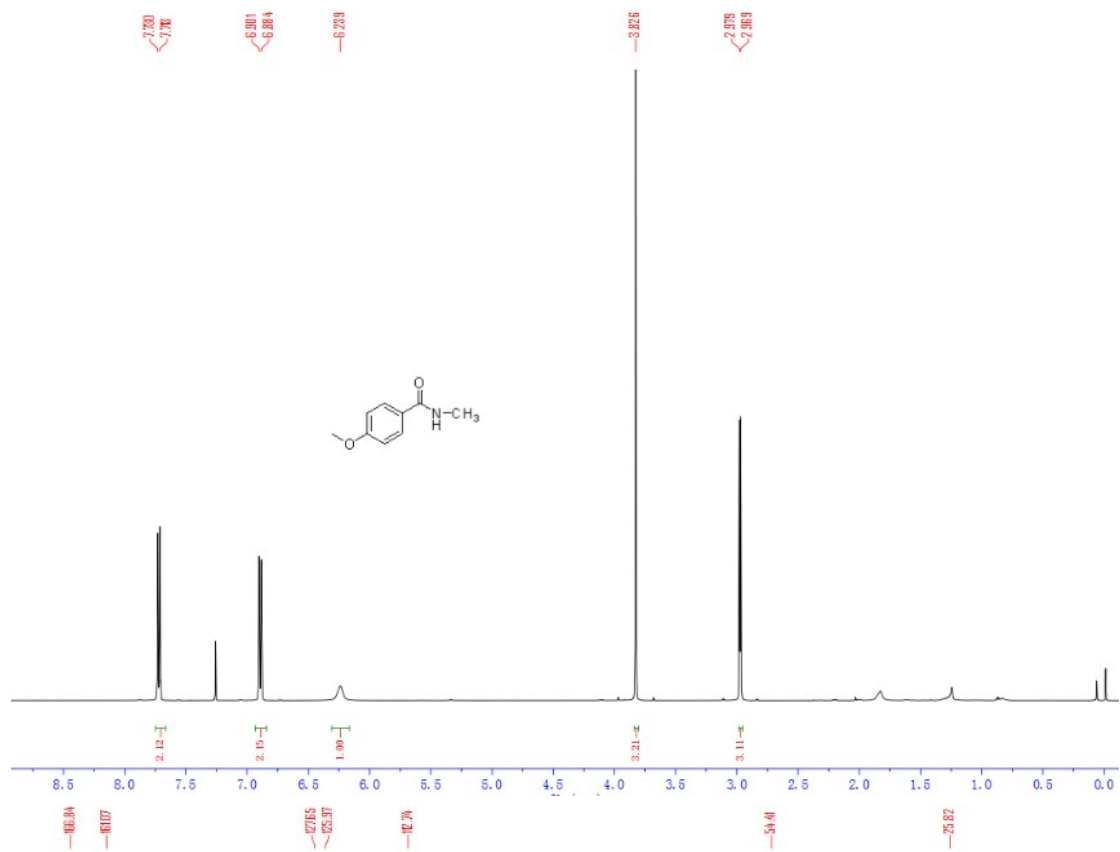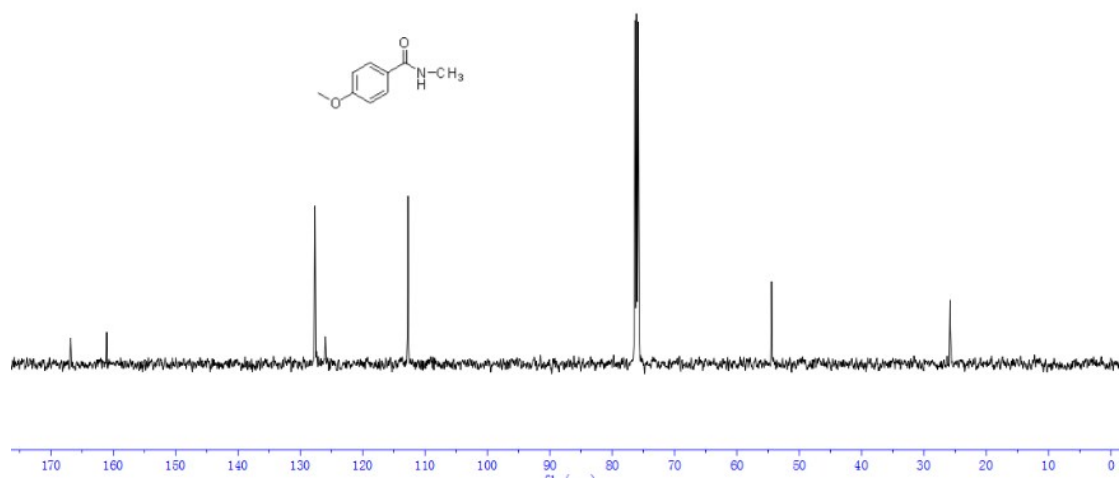

8.23  
8.19  
8.07  
8.03  
8.01  
8.007  
7.475  
7.47  
7.44  
7.440  
7.435  
7.448  
7.444  
7.438  
7.435  
7.425  
7.417  
7.385  
7.358  
7.352  
7.350  
7.337  
7.335  
7.223  
7.016  
7.008  
7.002  
6.995

3.039  
3.031

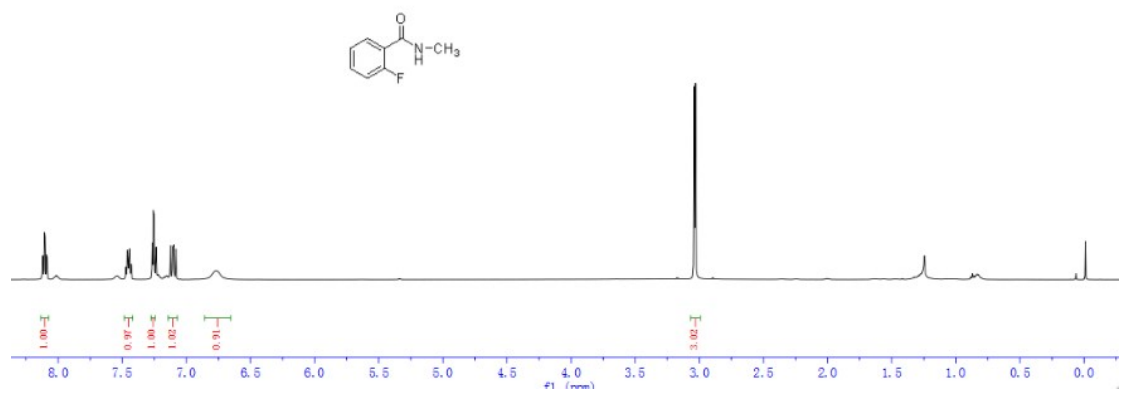

163.07  
133.25  
131.18  
121.83  
120.03  
115.96  
114.86  
25.87

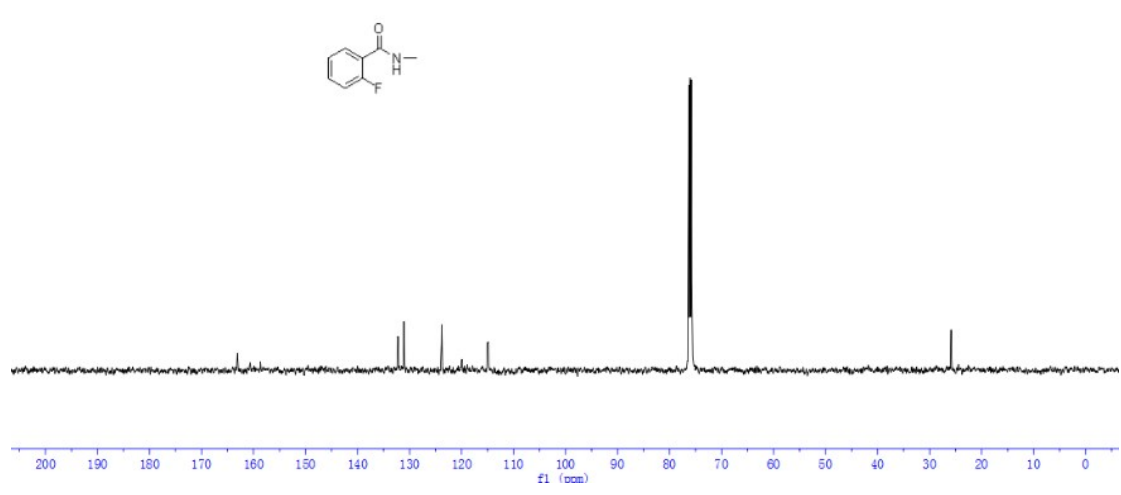

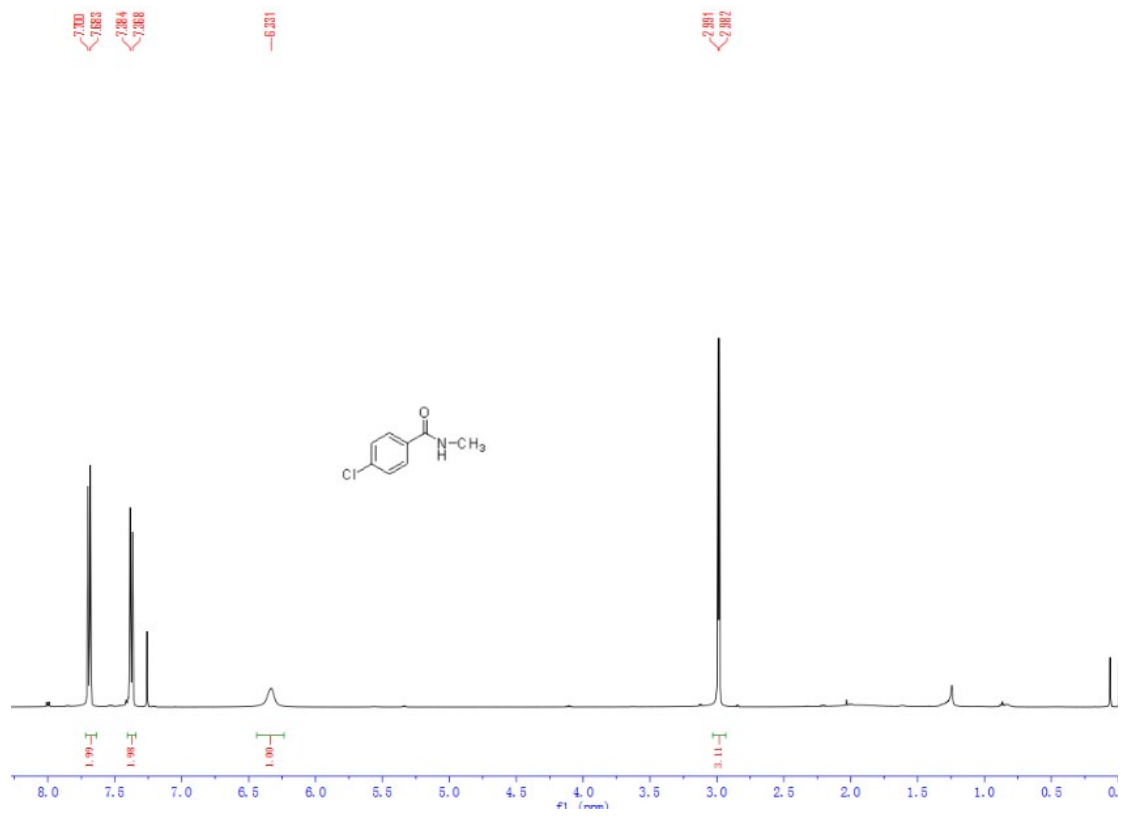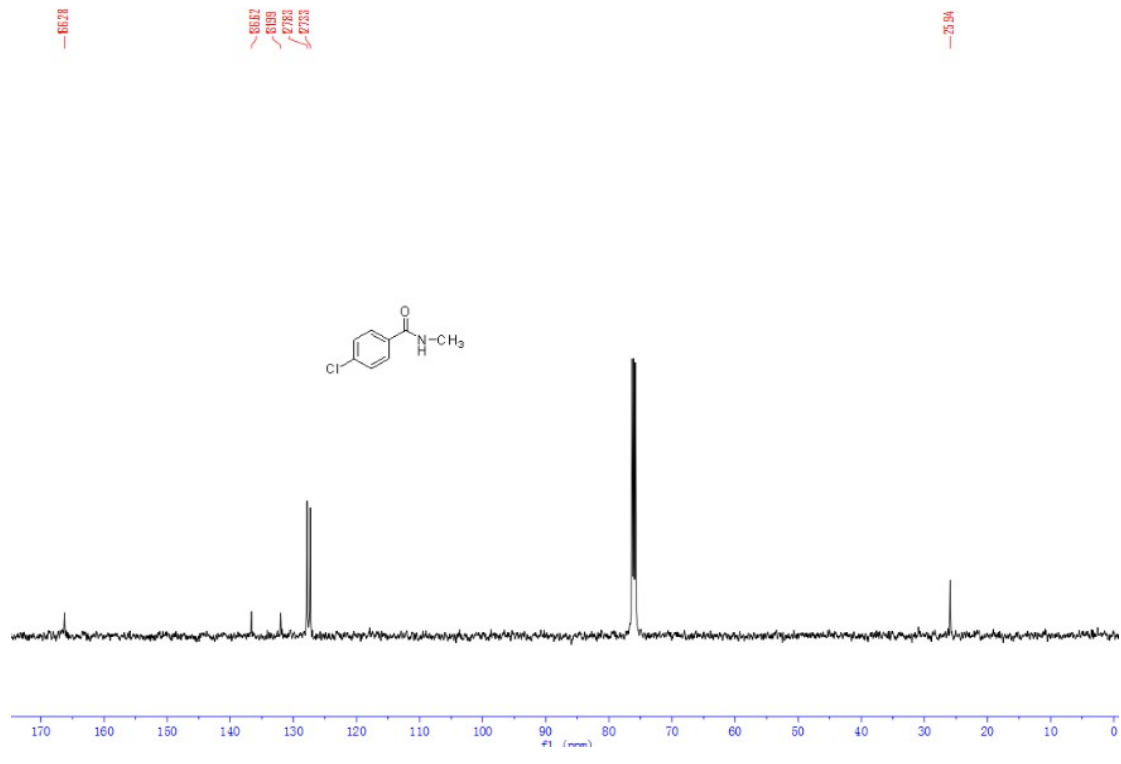

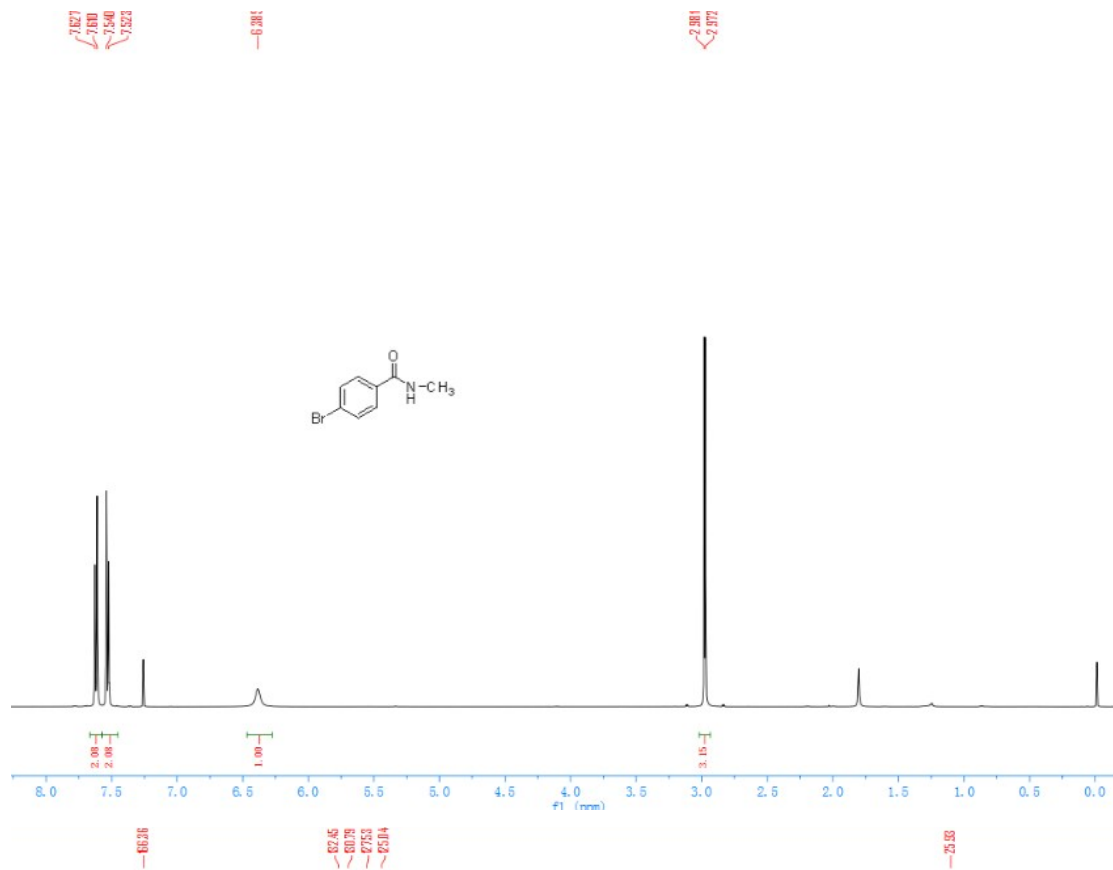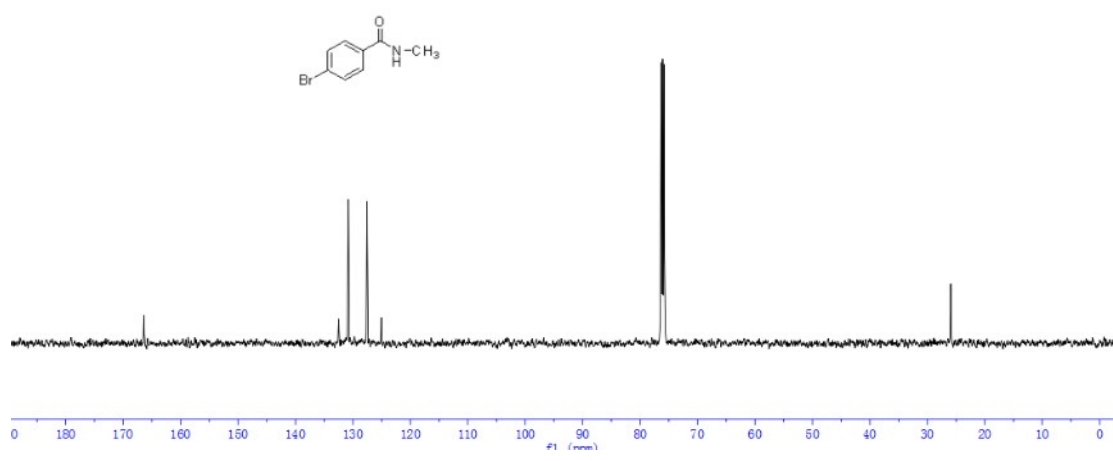

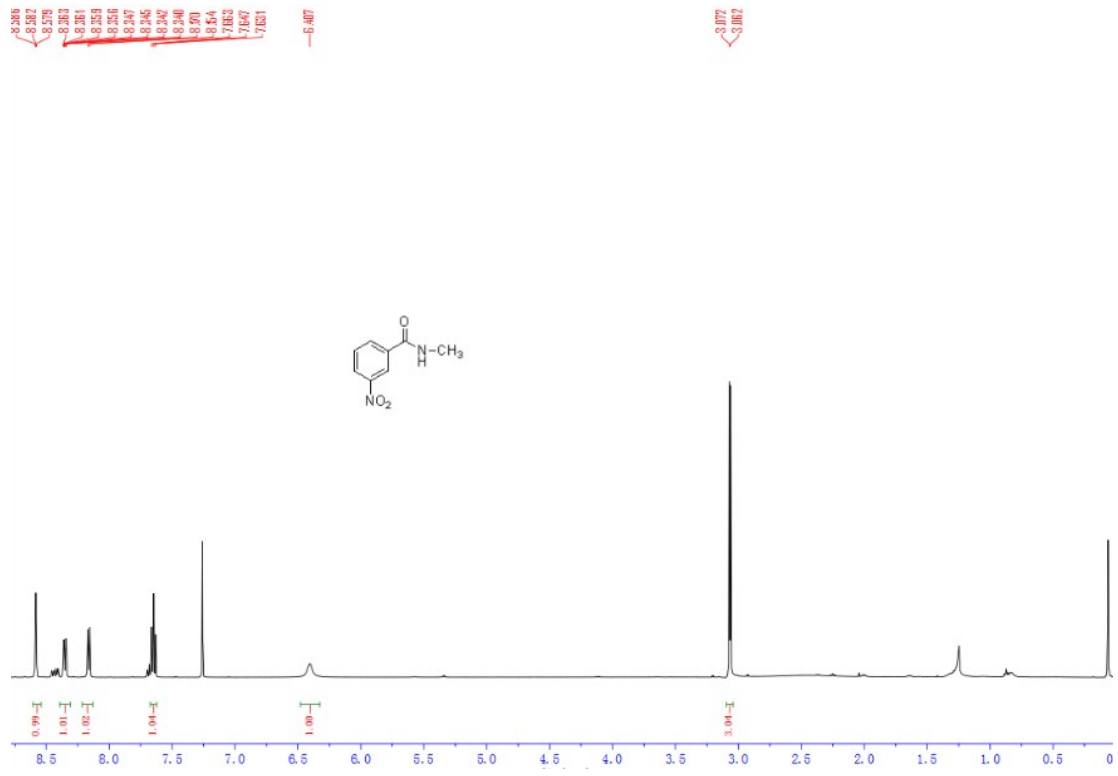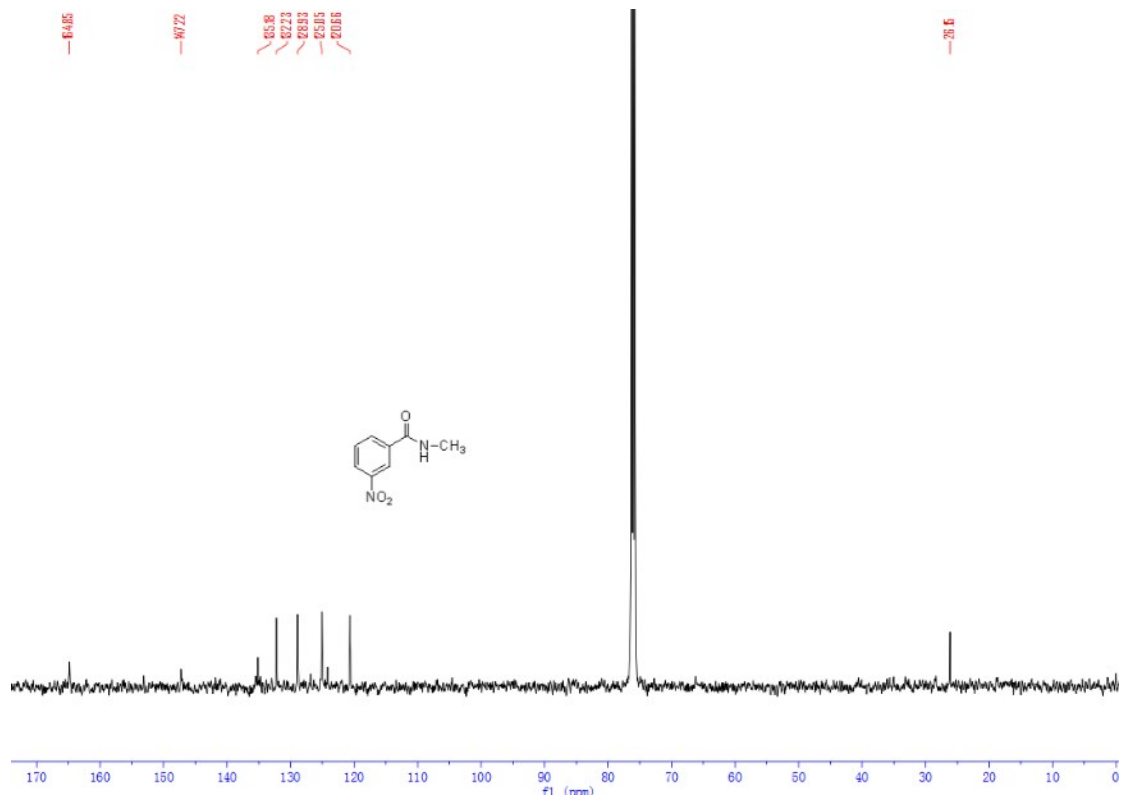

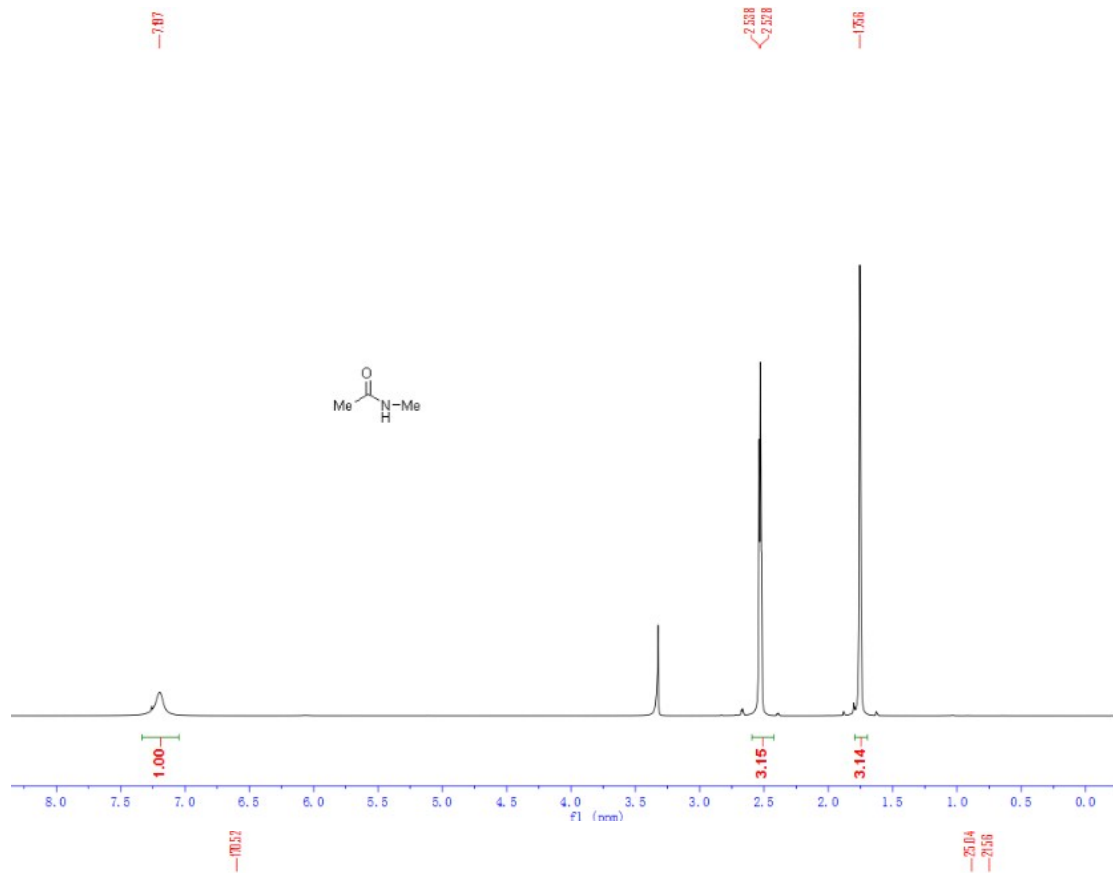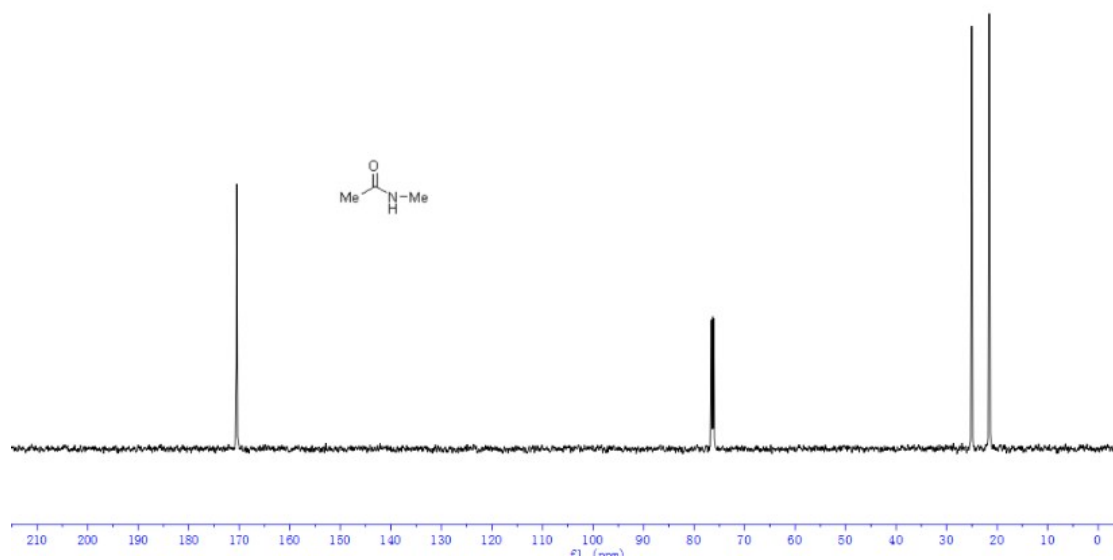

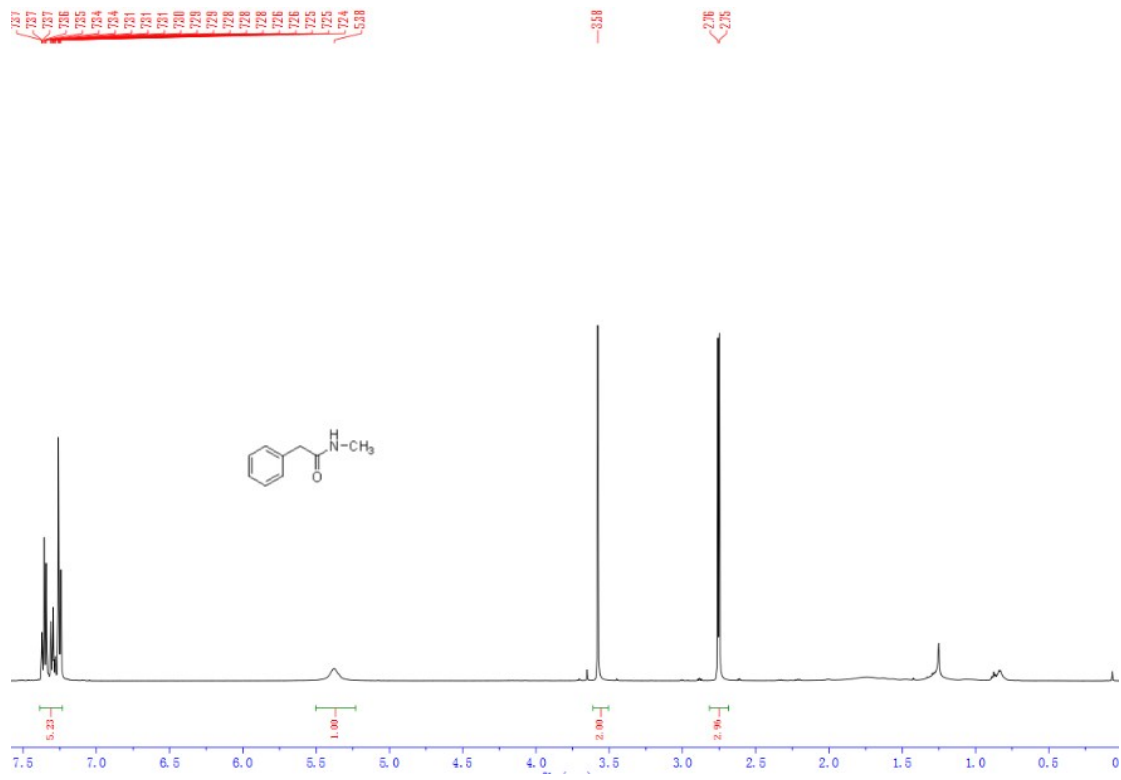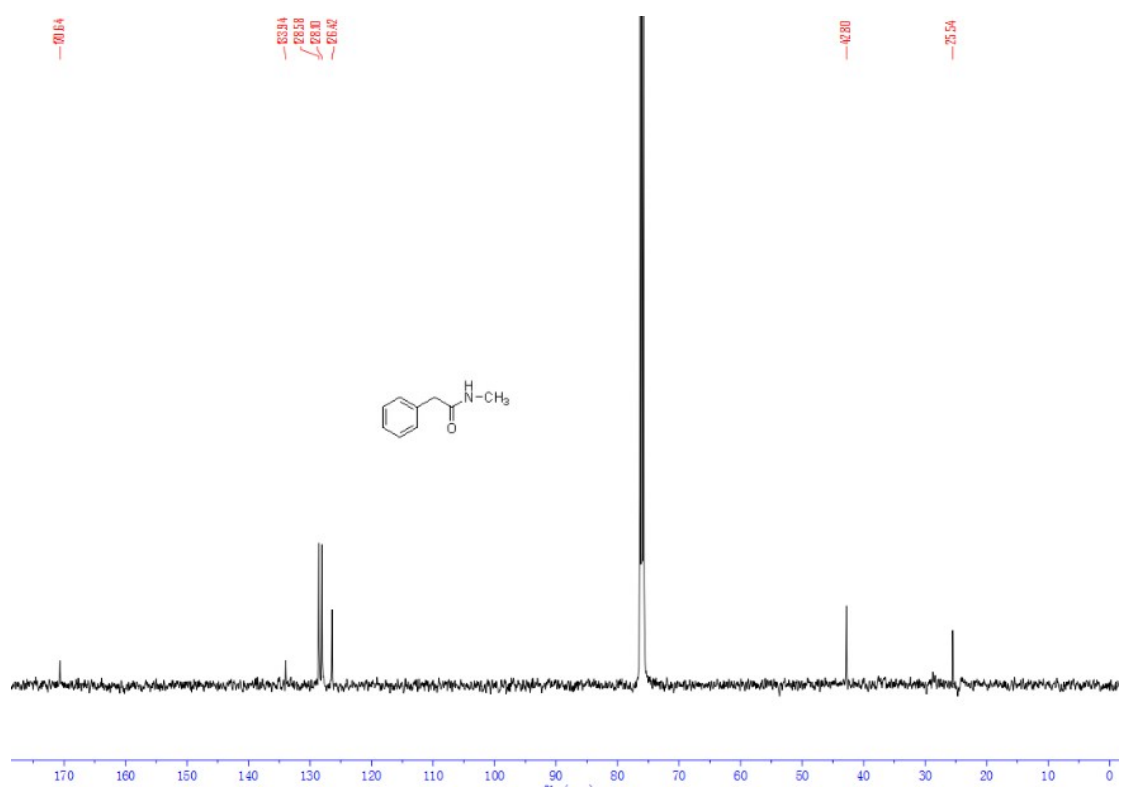

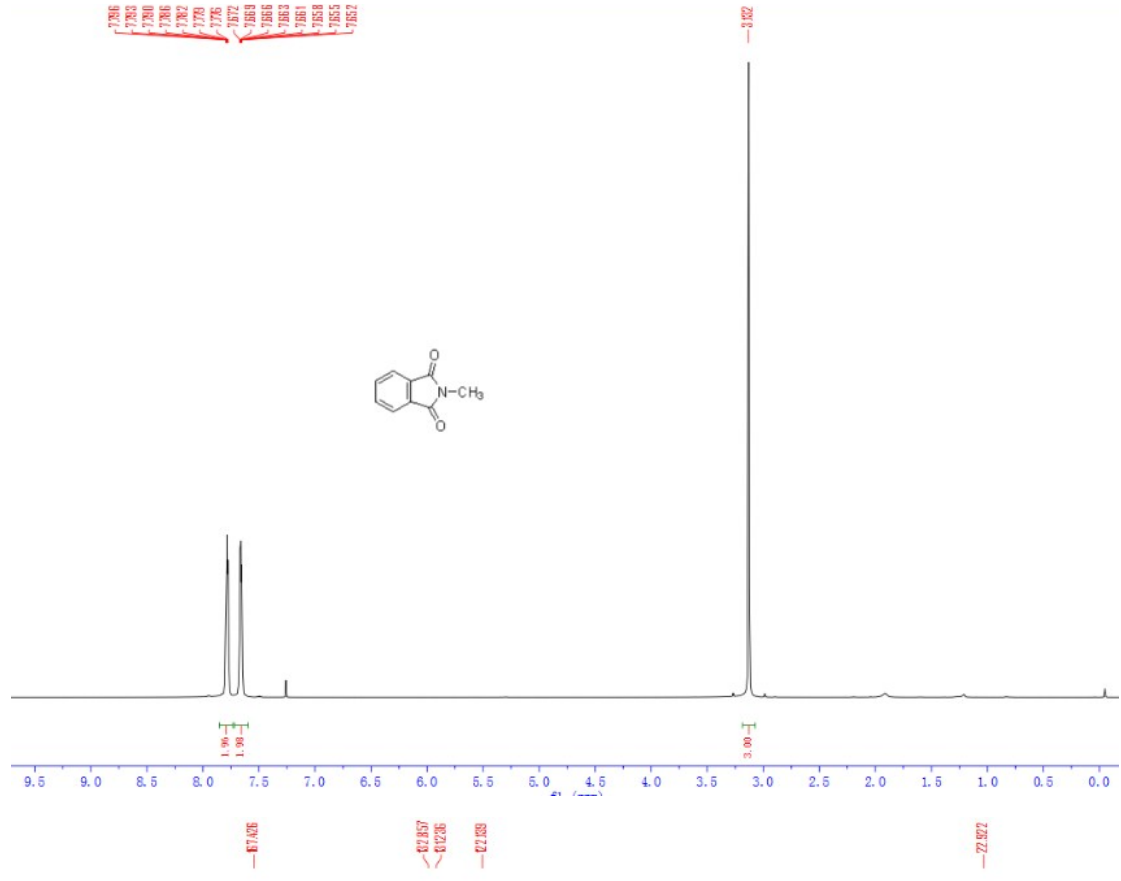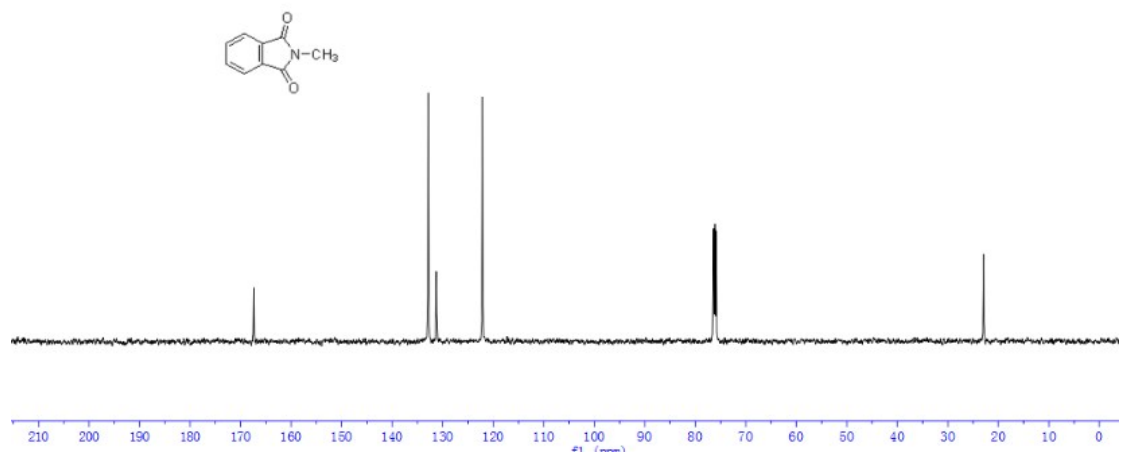



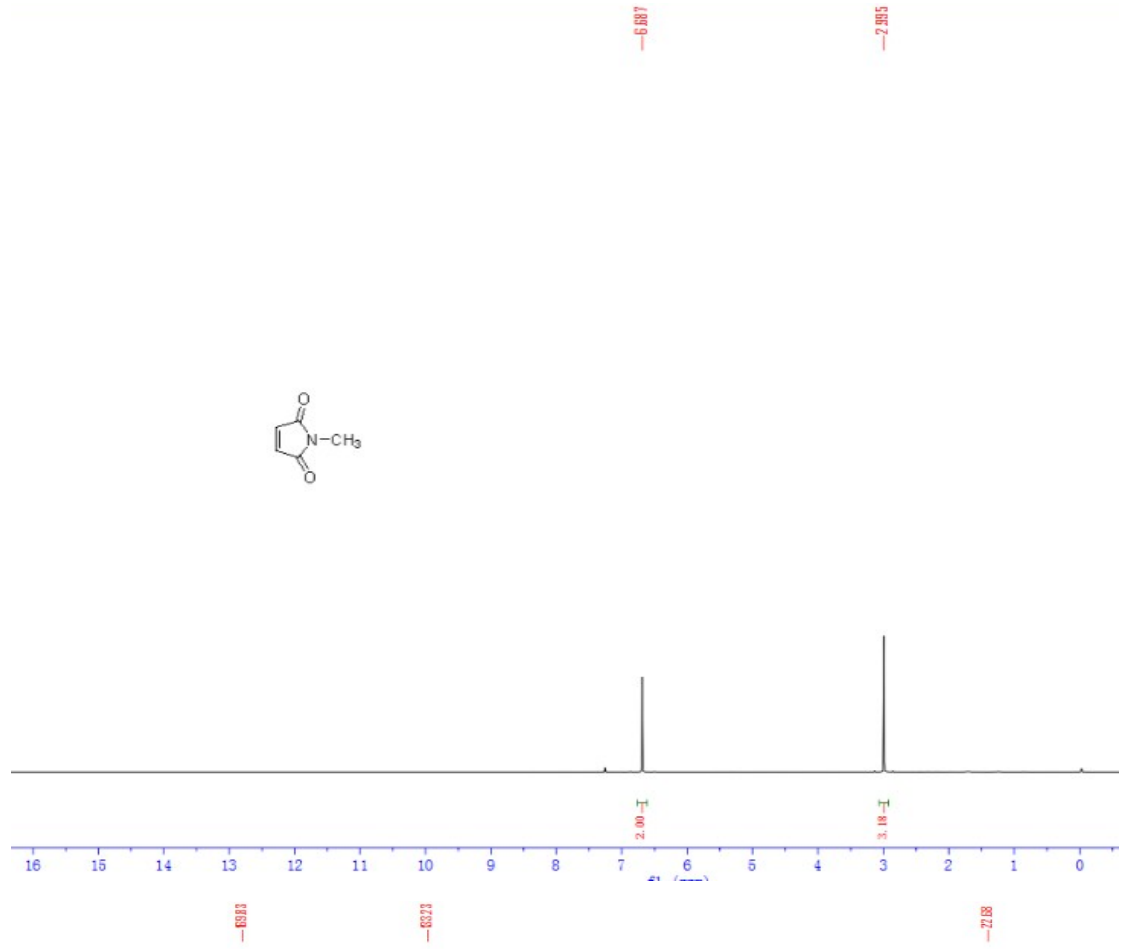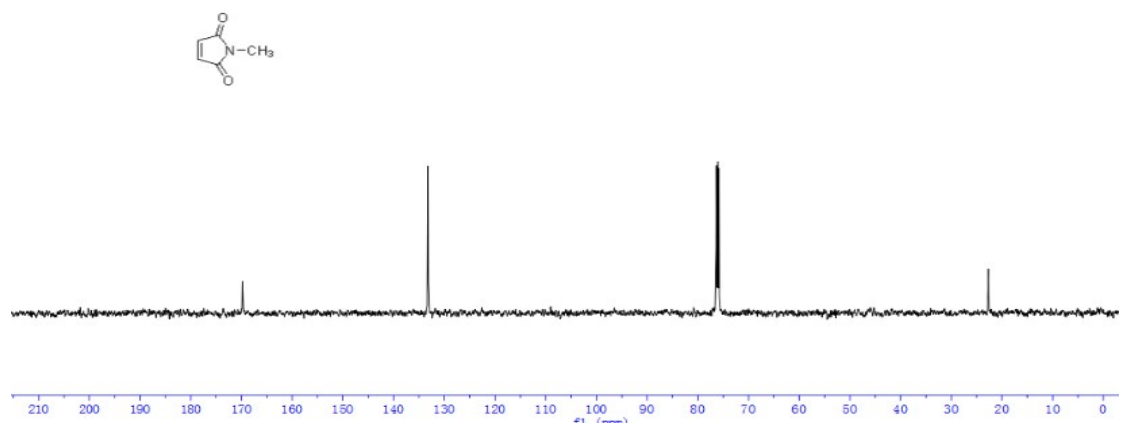

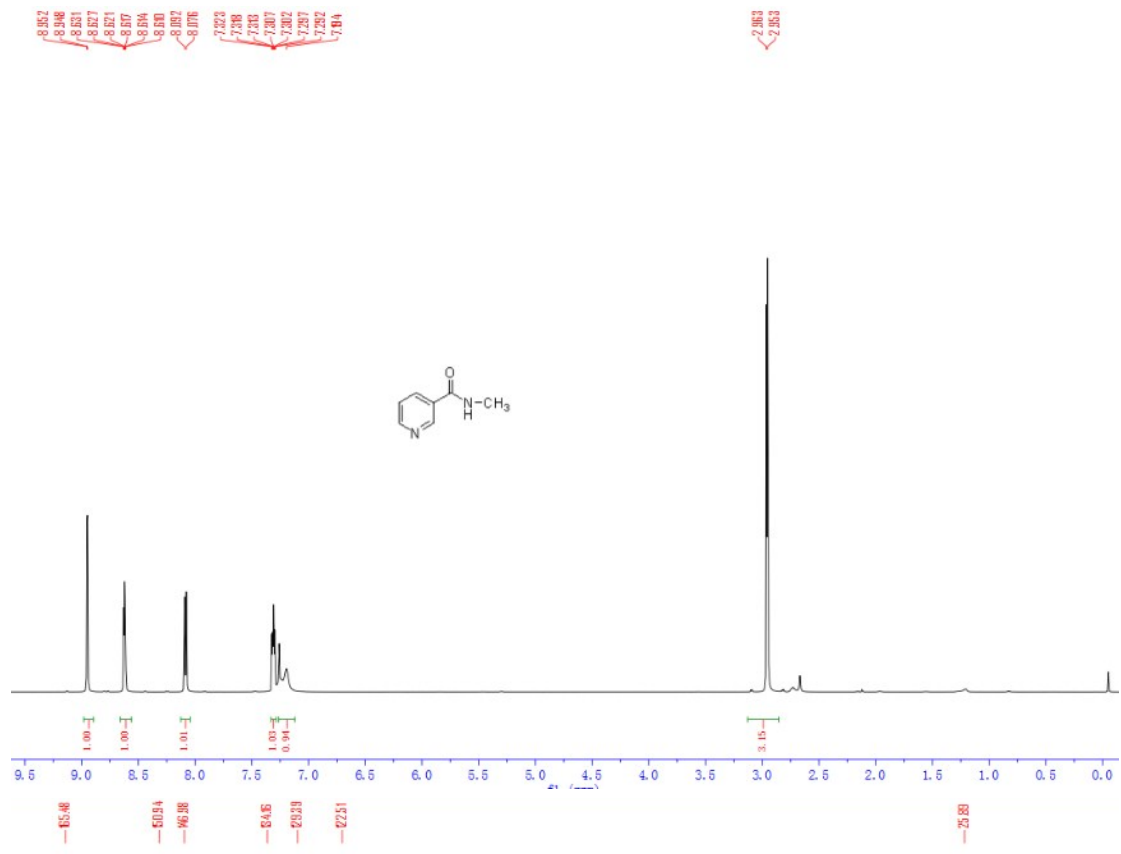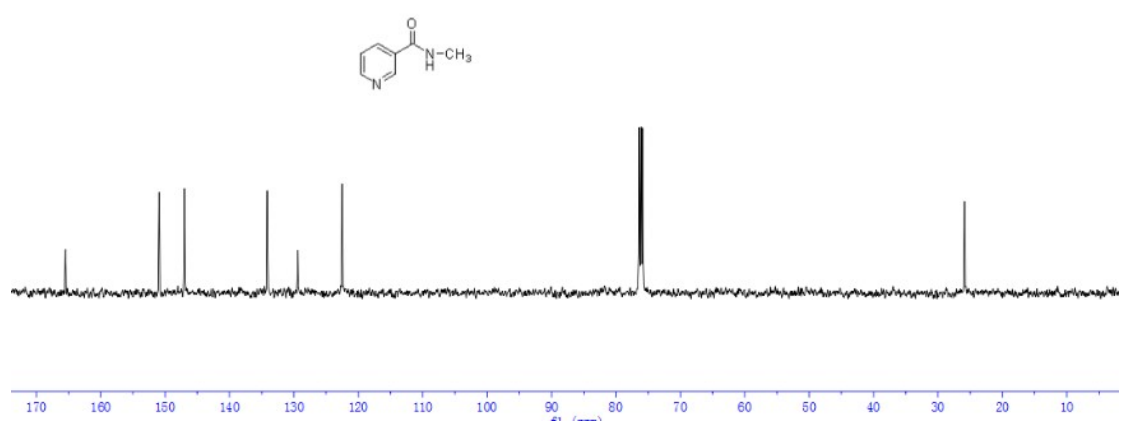

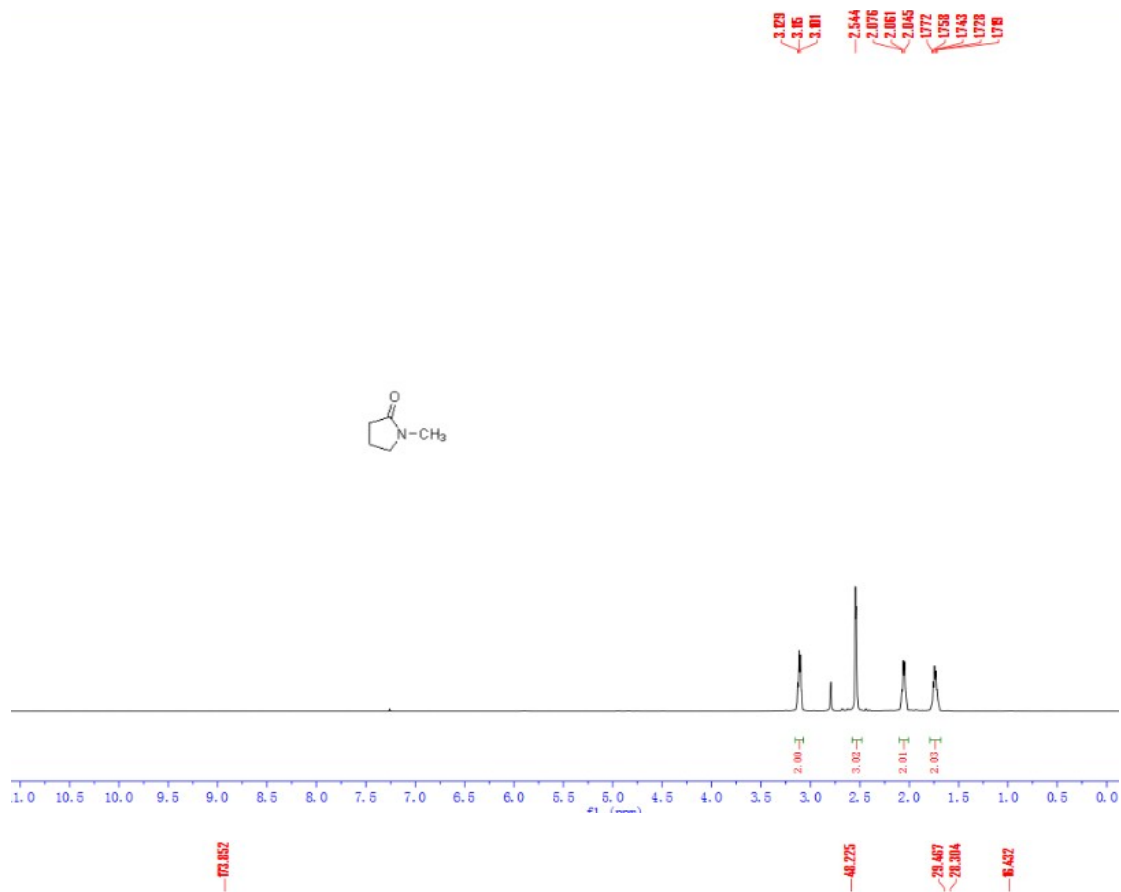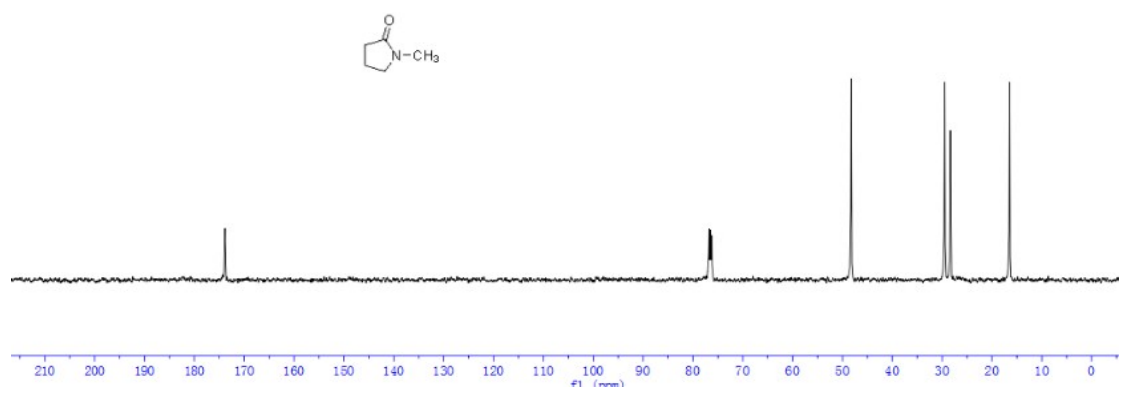

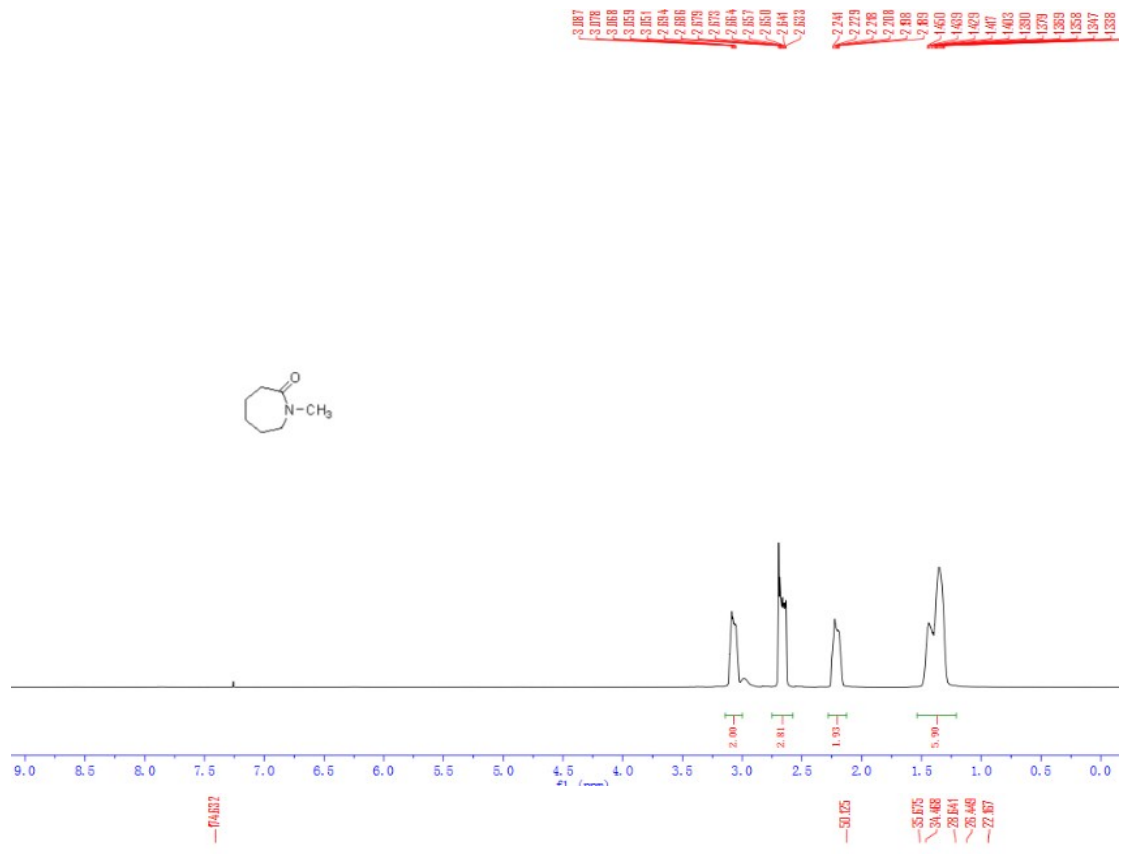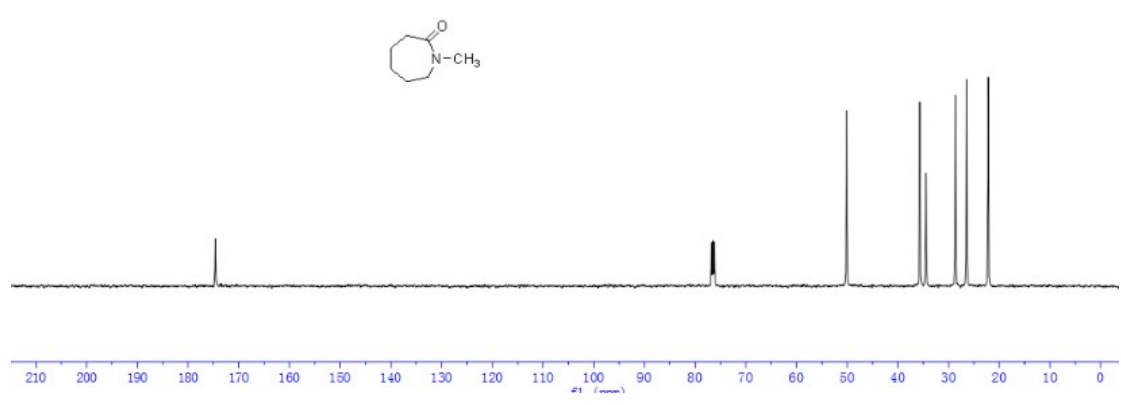

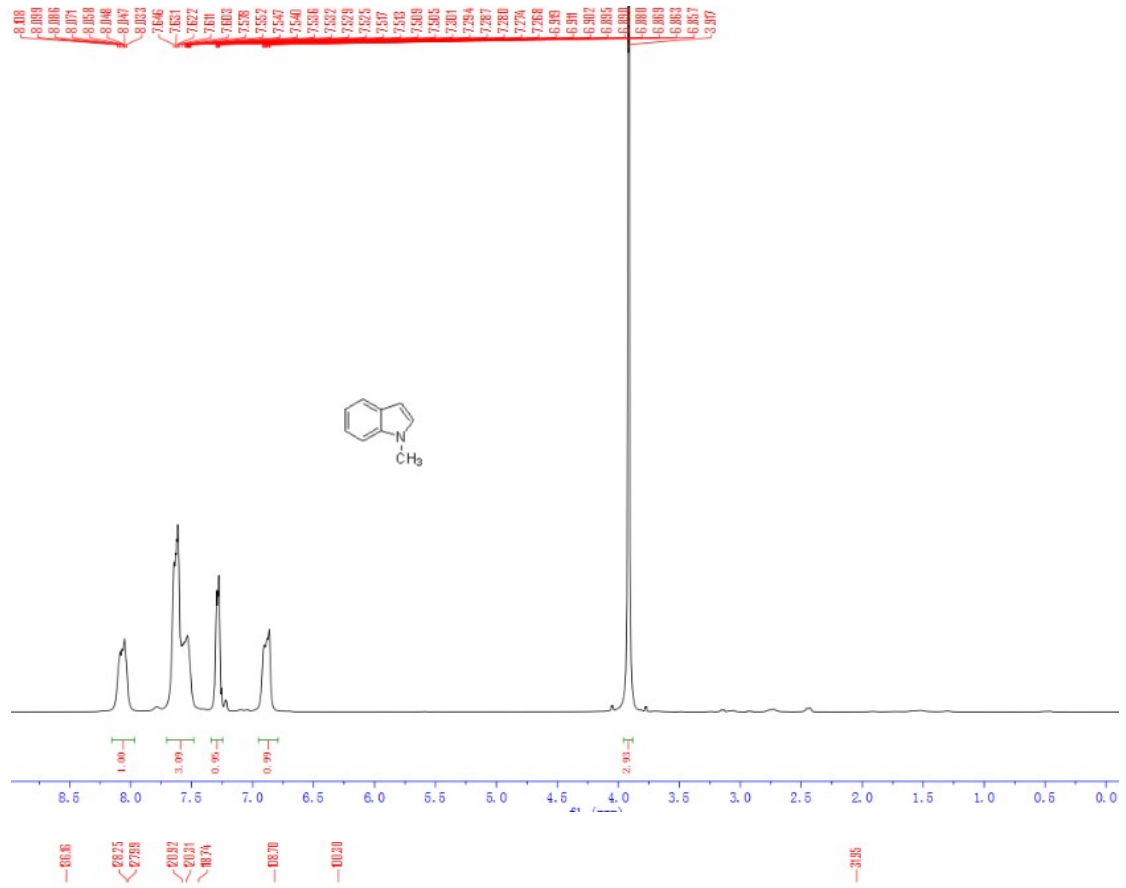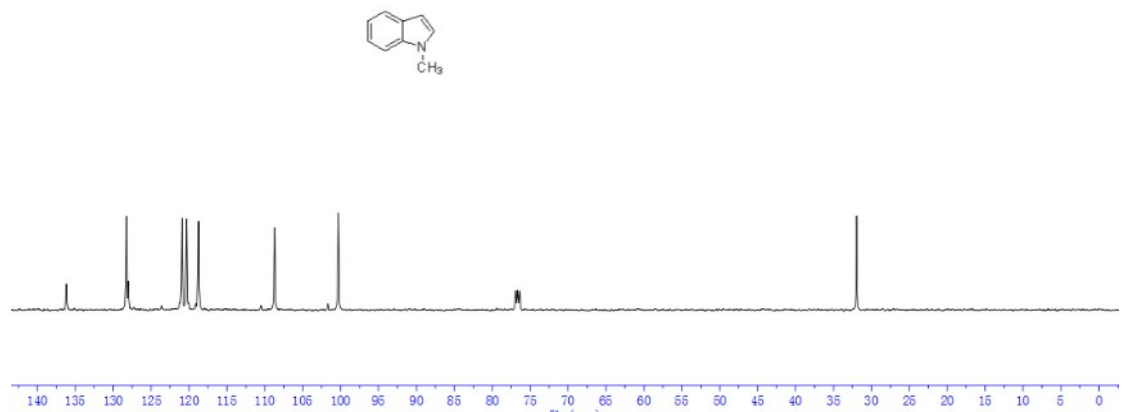

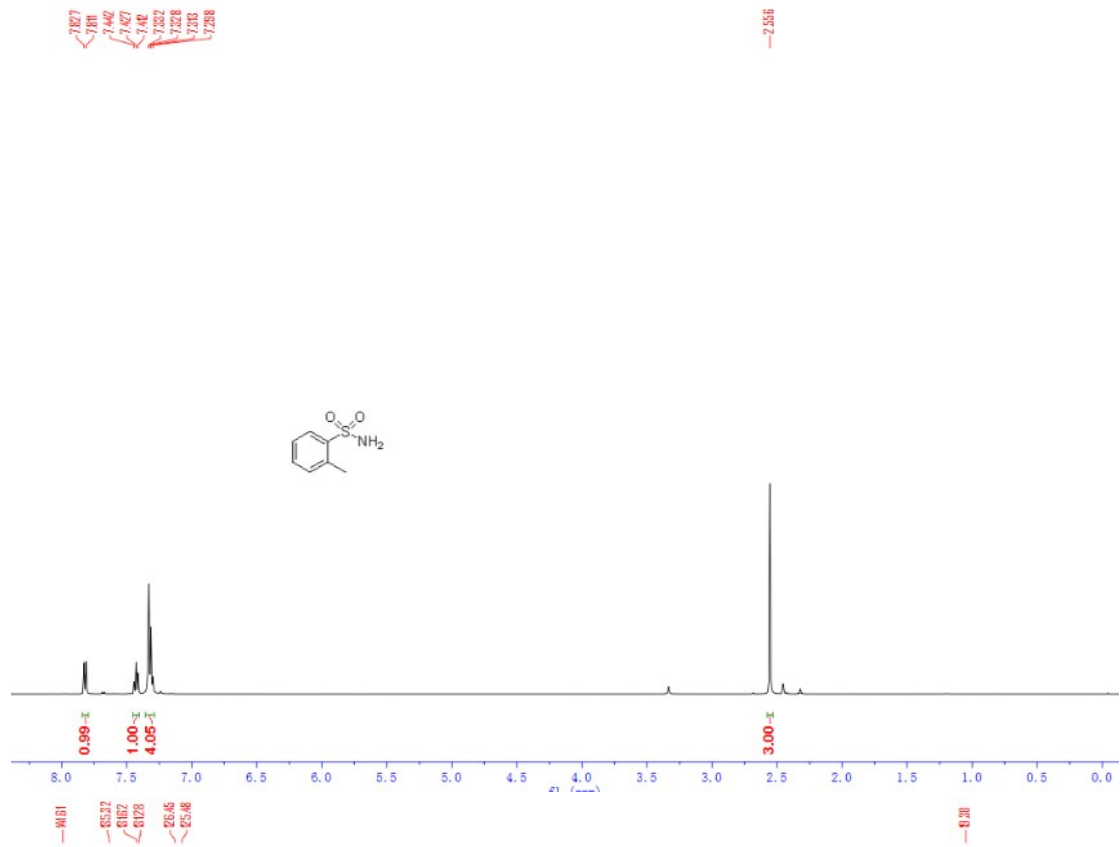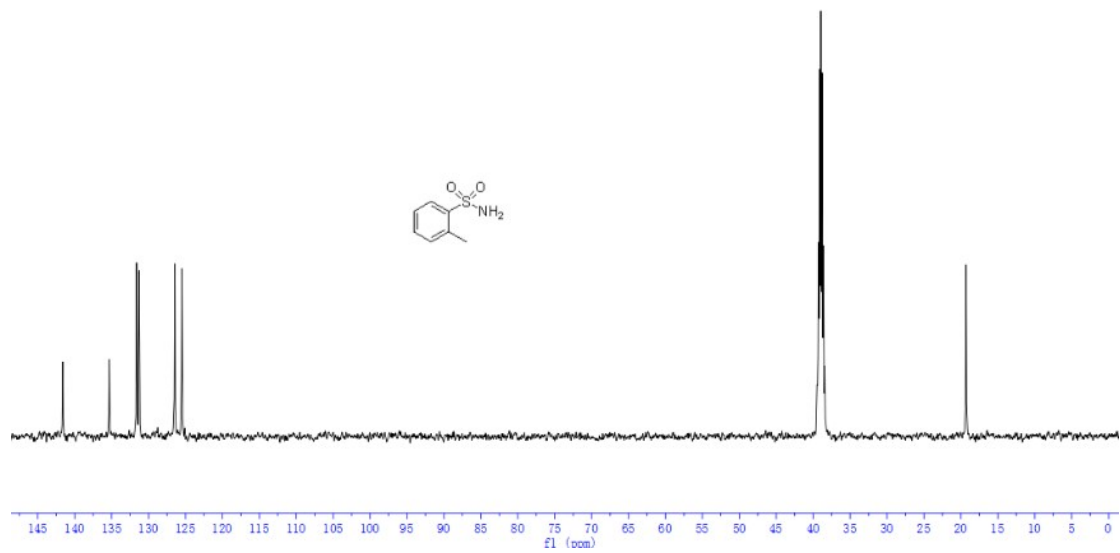

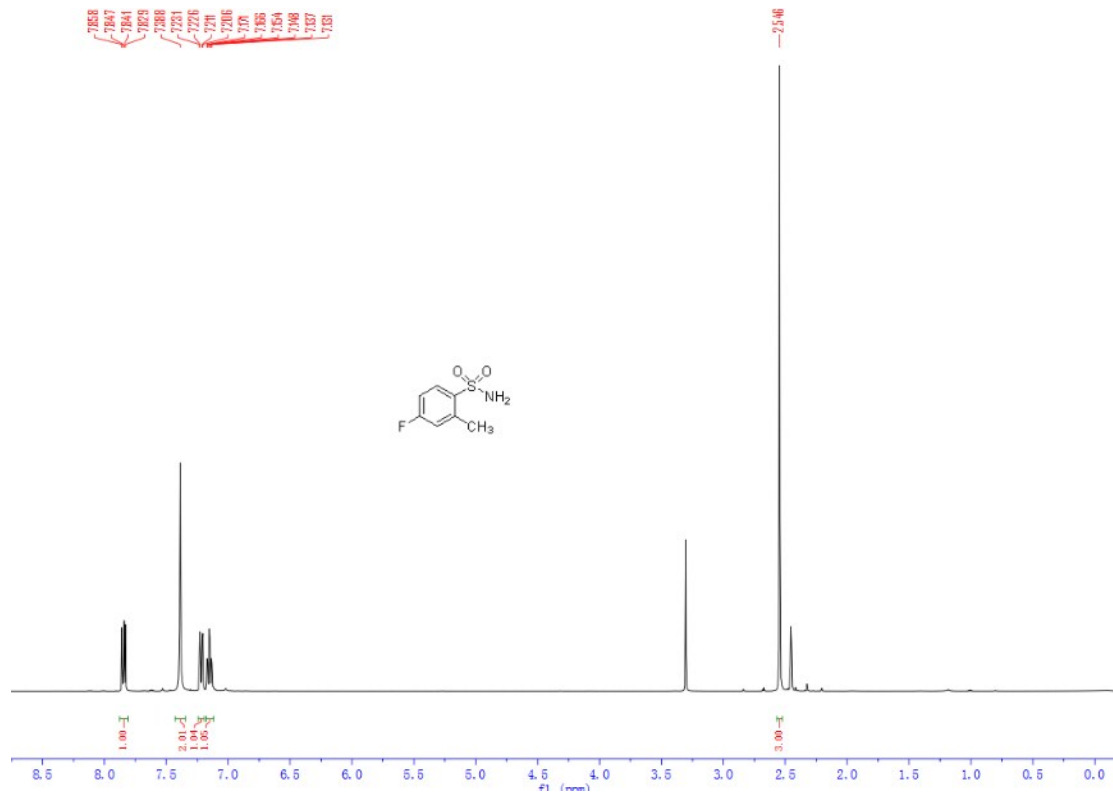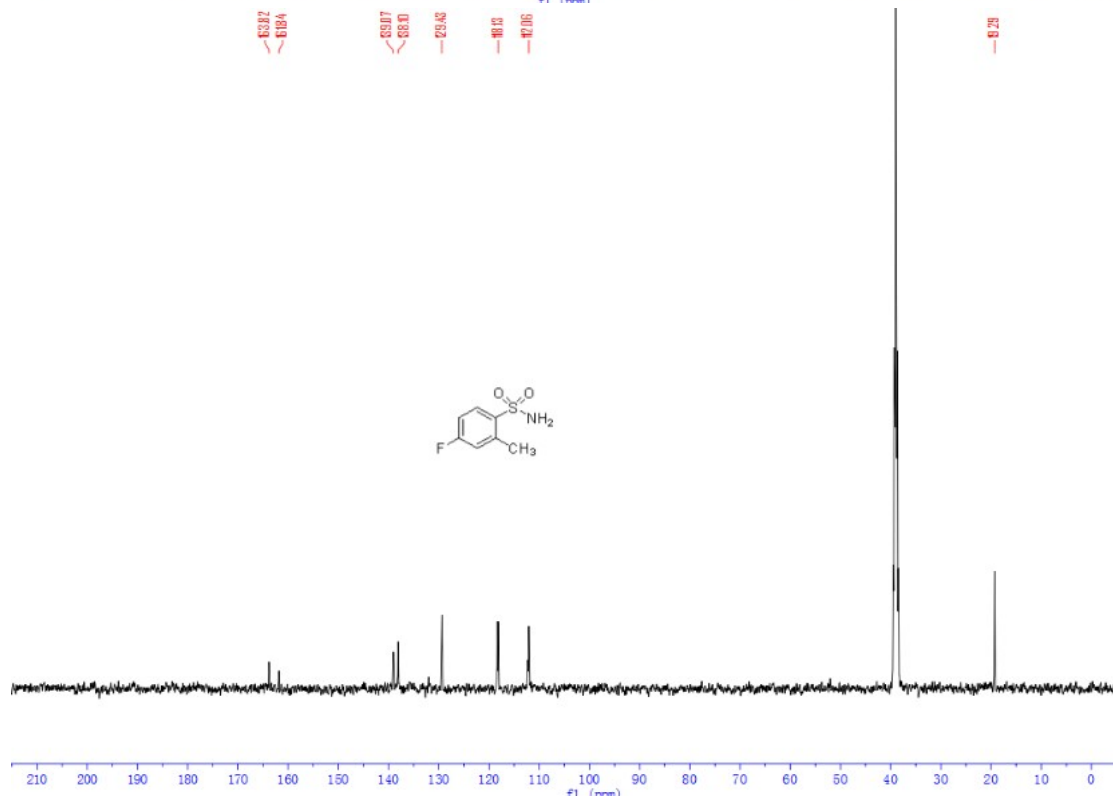

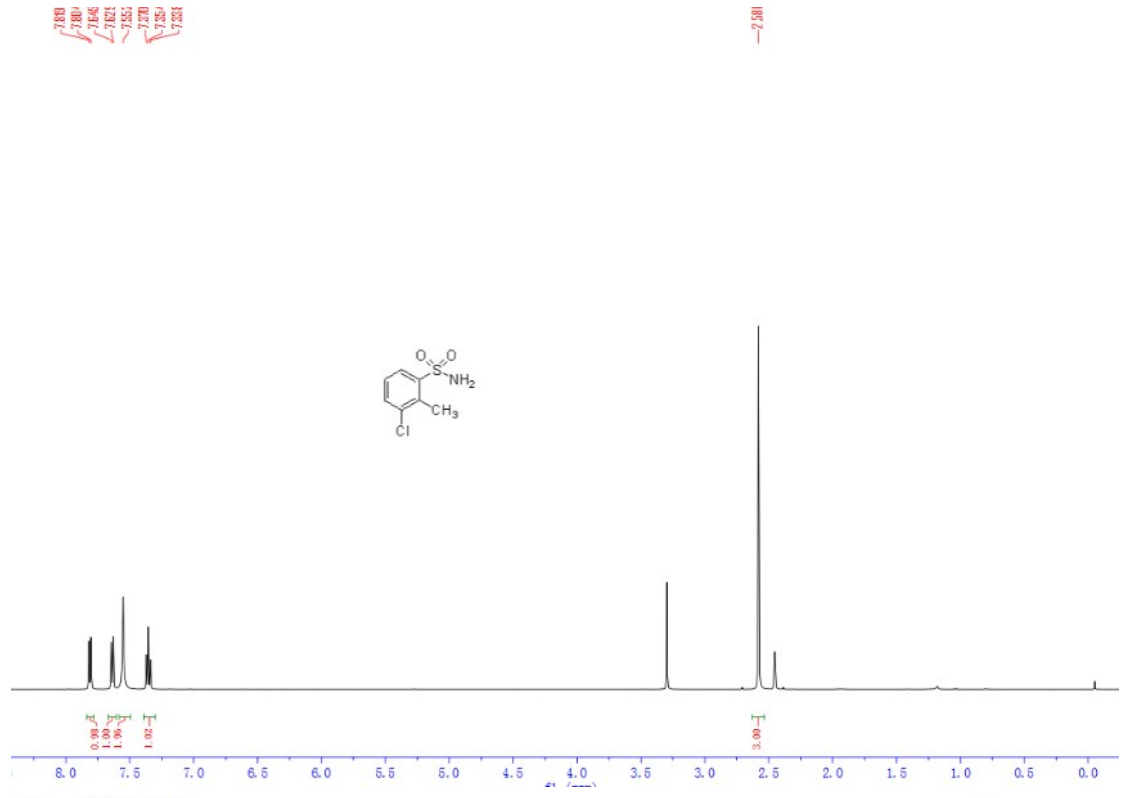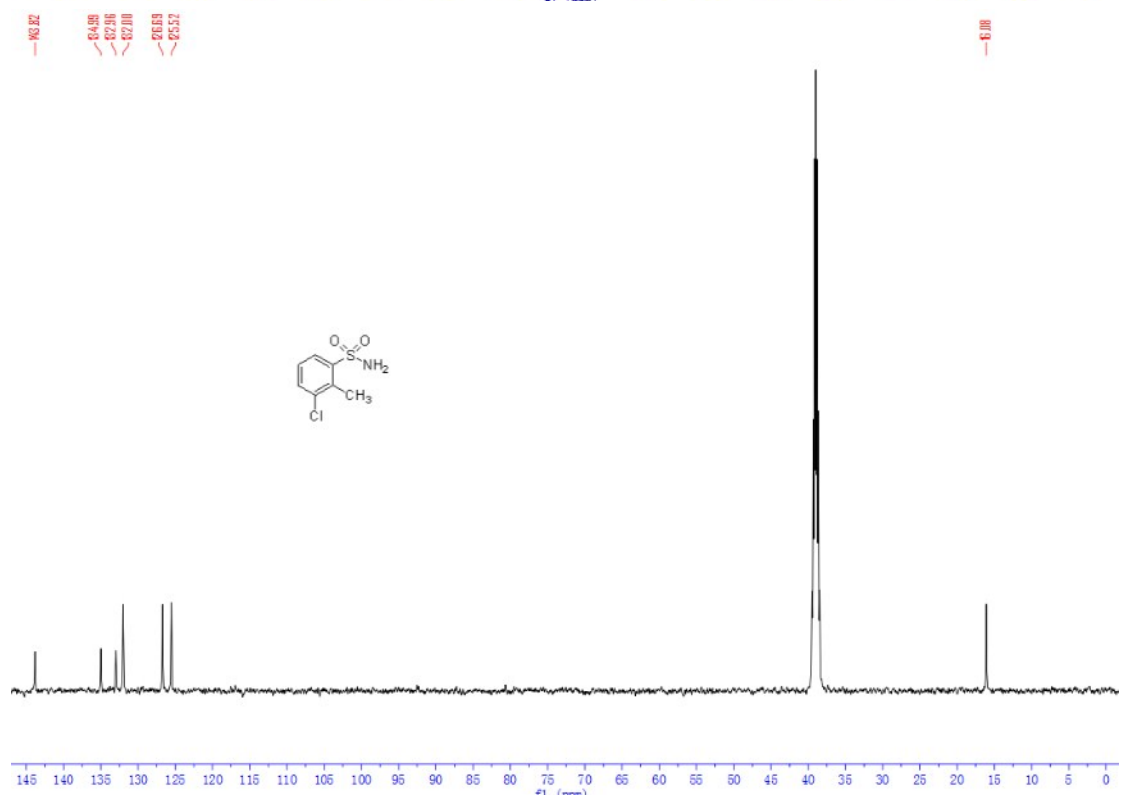



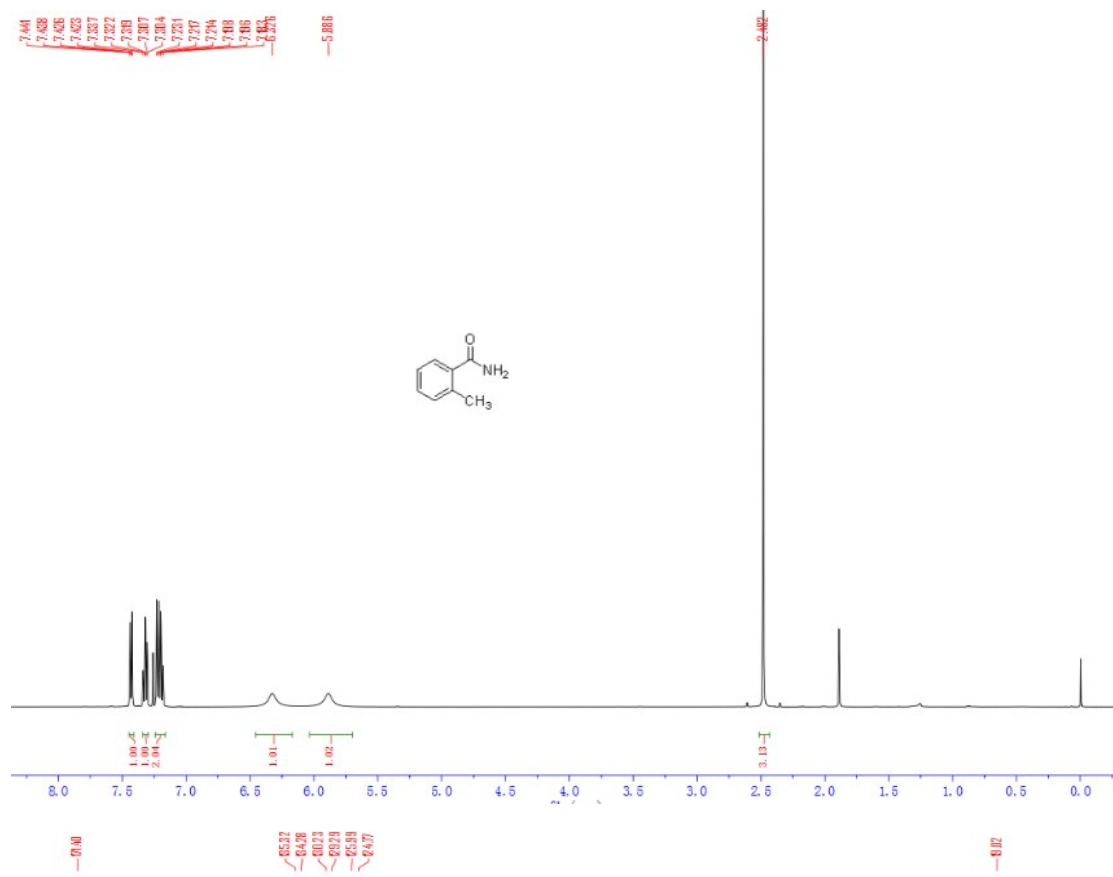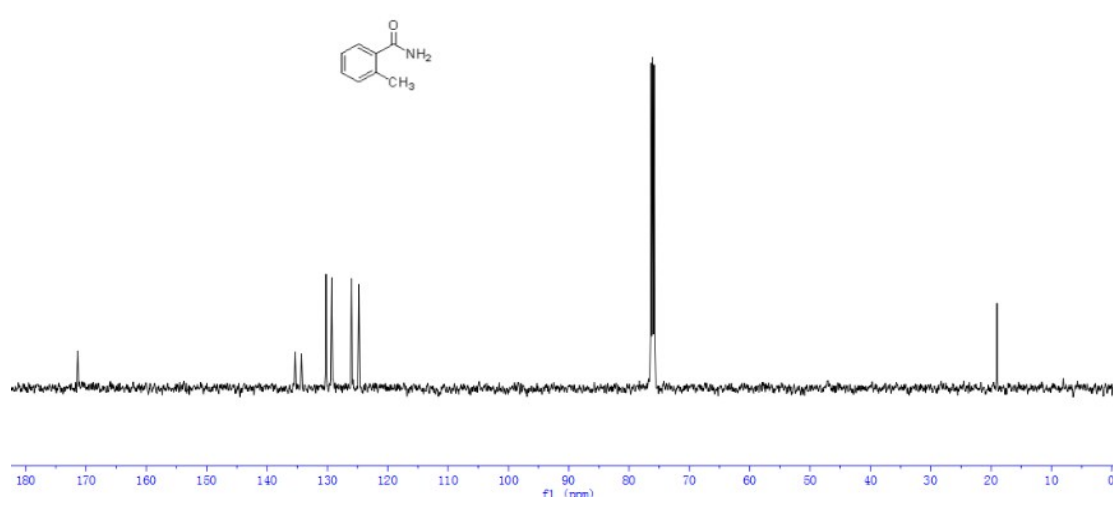

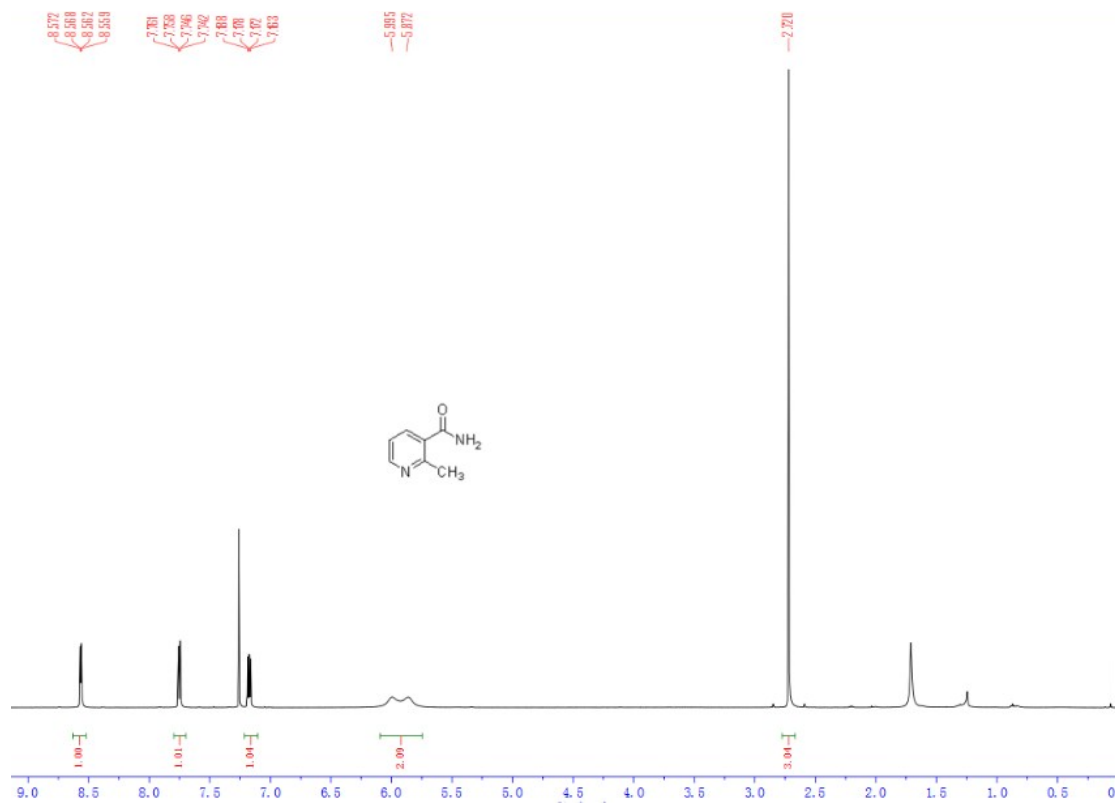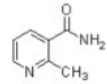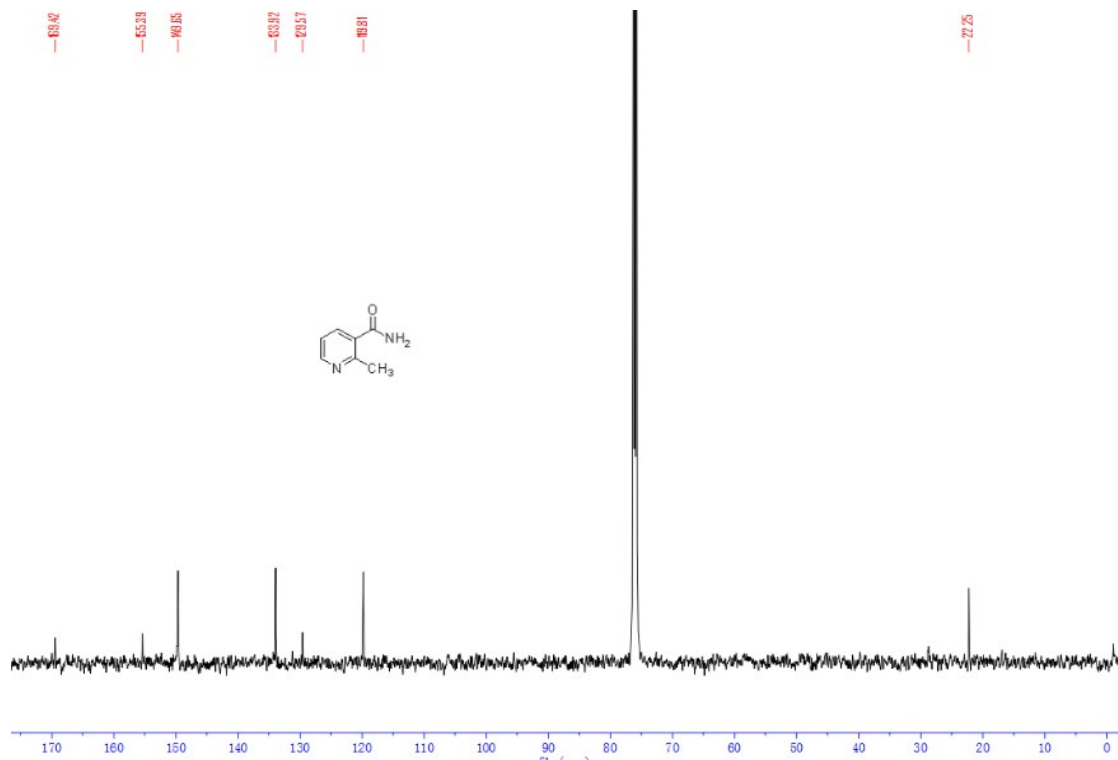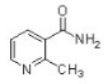

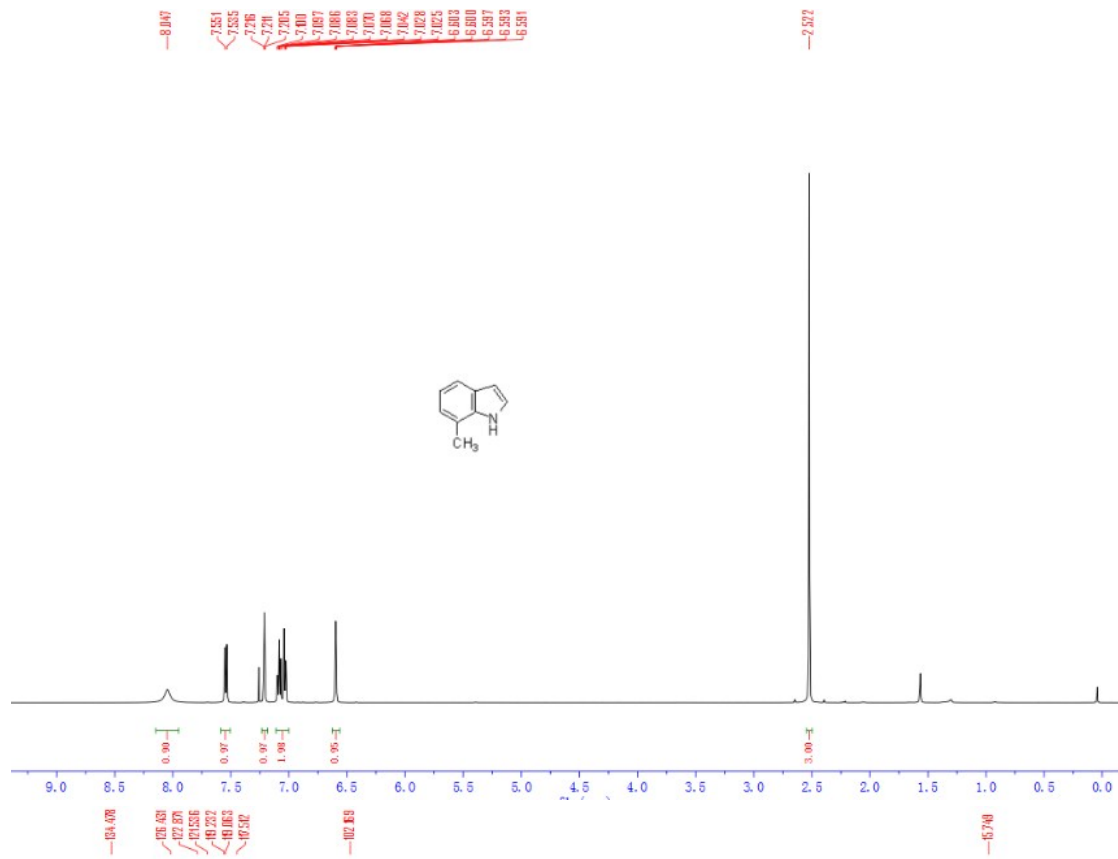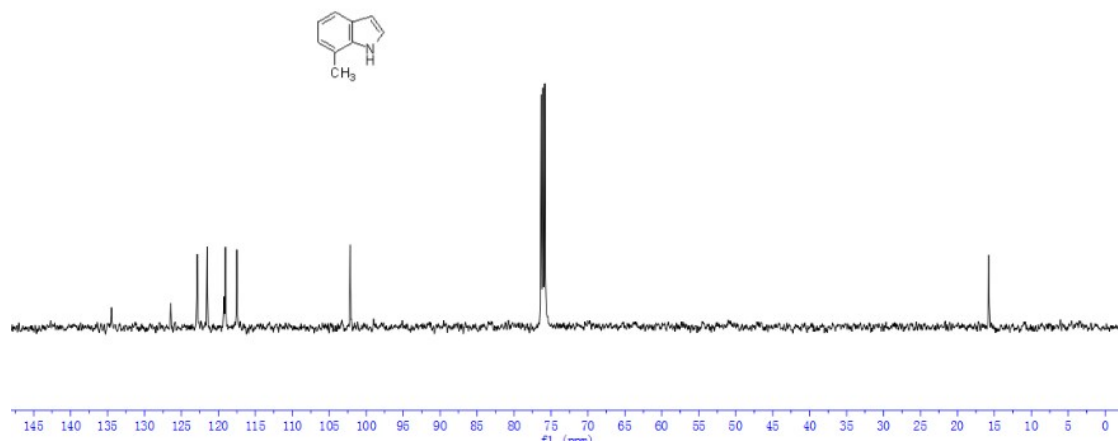

Supplement: c7qo00625j1.pdf [file c7qo00625j1.pdf]
